# Supplementary material for: Symptoms, physical measures and cognitive tests after SARS-CoV-2 infection in a large population-based case-control study
Source: Research Square preprint supplement (doi:10.21203/rs.3.rs-1539784/v1), 2022-04-19
Supplement: Supplementary file 2 [file 06f87944602aaa39b4983bf6.xlsx]

## Sheet: Supplementary Tables Index
Supplementary tables
Table S1. Demographics and comorbidities
Table S2. Classification of severity of the acute phase of the SARS-CoV-2 infection
Table S3a. Symptoms from the C19Q questionnaire
Table S3b. Symptoms from the C19Q questionnaire adjusted for comorbidities
Table S4a. Validated mental health, fatigue and quality of life questionnaire scales
Table S4b. Validated mental health, fatigue and quality of life questinnaire scales adjusted for comorbidities
Table S5a. Physiological test measures
Table S5b. Physiological test measures adjusted for comorbidities
Table S6. Comparing physiological test measures for individuals that participated in the deCODE health study both before and during the pandemic
Table S7a. Cognitive test measures
Table S7b. Cognitive test measures adjusted for comorbidities
Table S8a. Blood measures
Table S8b. Blood measures adjusted for comorbidities
Table S9. Long Covid and physiological, cognitive, and blood tests

## Sheet: S1 Comorbidities
Table S1. Demographics and comorbidities. Shown are the association of prior SARS-CoV-2 infection with sex, age and comorbidities using three different control groups; all controls, contemporary controls only and C19Q controls. Sex, age and comorbidities are also compared between cases that participated in our study vs those that were invited but did not participate (this comparison is performed …
	SARS-CoV-2 cases				Controls				Comparing groups
	SARS-CoV-2 cases participating in study	First wave SARS-CoV-2 cases participating in study	First wave SARS-CoV-2 infected not participating in study	SARS-CoV-2 cases with long covid symptom cluster	All controls	Contemporary controls	C19Q controls	C19Q controls with long covid symptom cluster	First wave SARS-CoV-2 case participants (1) vs non-participants (0)	SARS-CoV-2 cases (1) vs all controls (0)	SARS-CoV-2 cases (1) vs contemporary controls (0)	SARS-CoV-2 cases (1) vs C19Q controls (0)	SARS-CoV-2 cases with long covid symptom cluster (1) vs other SARS-CoV-2 cases (0)	C19Q controls with long covid symptom cluster (1) vs other C19Q controls (0)	Severity scale (ranging from 1 to 8)
									Effect (95% CI)	Effect (95% CI)	Effect (95% CI)	Effect (95% CI)	Effect (95% CI)	Effect (95% CI)	Effect (95% CI)
N all	1721	1165	462	503	14388	546	1283	193
Sex, N women	879 (51%)	224 (48%)	224 (48%)	336 (67%)	8102 (57%)	269 (49%)	706 (55%)	131 (68%)	1.14 (0.92 to 1.42)	0.8 (0.73 to 0.89)**	1.07 (0.89 to 1.3)	0.85 (0.74 to 0.99)*	2.48 (1.99 to 3.08)**	1.89 (1.37 to 2.62)**	1.06 (1.01 to 1.12)*
Age, mean (range)	45.6 (18-93)	41.7 (18-104)	41.7 (18-104)	46.6 (18-88)	55.5 (18-97)	47.6 (19-89)	47.5 (18-88)	47.1 (19-79)	4.5 (2.7 to 6.2)**	-10 (-10.7 to -9.2)**	-2 (-3.4 to -0.6)*	-2 (-3 to -0.9)**	1.3 (-0.3 to 2.9)	-0.6 (-2.6 to 1.5)	1.9 (1.5 to 2.3)**
Time since diagnosis, mean (range)	273 (157-539)	283.4 (169-539)		268.2 (165-530)									-6.7 (-13.7 to 0.2)		0.0 (-1.8 to 1.8)
Comorbidities
Obesity	561 (33%)	385 (33%)	6 (46%)	217 (43%)	4886 (34%)	170 (31%)	427 (33%)	89 (46%)	NA	1.08 (0.96 to 1.2)	1.14 (0.92 to 1.4)	1.03 (0.88 to 1.21)	1.83 (1.46 to 2.3)**	1.97 (1.43 to 2.7)**	0.44 (0.26 to 0.62)**
Hypertension	293 (18%)	208 (19%)	56 (15%)	101 (21%)	5188 (36%)	118 (23%)	292 (23%)	53 (28%)	1.27 (0.86 to 1.88)	0.68 (0.59 to 0.79)**	0.77 (0.59 to 1.01)	0.72 (0.58 to 0.88)*	1.31 (0.96 to 1.78)	1.66 (1.11 to 2.48)*	0.32 (0.08 to 0.57)*
Asthma	179 (11%)	134 (12%)	49 (13%)	81 (17%)	1986 (14%)	75 (14%)	182 (14%)	35 (18%)	0.86 (0.6 to 1.22)	0.83 (0.71 to 0.98)*	0.74 (0.55 to 0.99)*	0.76 (0.61 to 0.95)*	2.03 (1.47 to 2.81)**	1.29 (0.85 to 1.94)	0.73 (0.46 to 1)**
Immunocompromised state	99 (10%)	89 (10%)	2 (15%)	55 (17%)	2433 (17%)	46 (12%)	159 (14%)	32 (19%)	NA	0.69 (0.56 to 0.86)**	0.79 (0.54 to 1.15)	0.67 (0.51 to 0.87)*	3.01 (1.93 to 4.68)**	1.5 (0.97 to 2.33)	0.55 (0.18 to 0.93)*
Cancer	75 (4%)	61 (5%)	15 (3%)	32 (6%)	1340 (9%)	24 (4%)	65 (5%)	9 (5%)	NA	0.81 (0.63 to 1.04)	1.07 (0.66 to 1.75)	0.87 (0.61 to 1.24)	1.68 (1.02 to 2.78)*	0.94 (0.44 to 1.98)	0.04 (-0.38 to 0.46)
Type 2 diabetes	80 (5%)	58 (5%)	23 (5%)	31 (6%)	1092 (8%)	26 (5%)	68 (5%)	17 (9%)	0.95 (0.57 to 1.58)	0.83 (0.66 to 1.06)	1.02 (0.64 to 1.61)	0.92 (0.66 to 1.29)	1.4 (0.87 to 2.27)	1.82 (1.02 to 3.26)*	0.86 (0.47 to 1.26)**
Coronary artery disease	69 (4%)	56 (5%)	21 (6%)	30 (6%)	1460 (10%)	20 (4%)	56 (4%)	8 (4%)	1.29 (0.68 to 2.43)	0.76 (0.58 to 0.99)*	1.18 (0.68 to 2.04)	0.89 (0.6 to 1.31)	2.37 (1.34 to 4.2)*	1.27 (0.57 to 2.86)	0.88 (0.43 to 1.32)**
Cerebrovascular disease	14 (1%)	14 (1%)	9 (2%)	5 (1%)	406 (3%)	5 (1%)	21 (2%)	6 (3%)	0.64 (0.27 to 1.53)	0.51 (0.3 to 0.88)*	0.94 (0.34 to 2.63)	0.49 (0.25 to 0.97)*	1.26 (0.41 to 3.89)	2.91 (1.07 to 7.94)*	0.06 (-0.86 to 0.97)
Heart failure	15 (1%)	7 (1%)	14 (3%)	9 (2%)	348 (2%)	6 (1%)	14 (1%)	4 (2%)	0.24 (0.09 to 0.64)*	0.76 (0.44 to 1.29)	0.82 (0.31 to 2.16)	0.78 (0.37 to 1.64)	3.85 (1.32 to 11.22)*	3.01 (0.88 to 10.29)	1.43 (0.52 to 2.35)*
Chronic kidney disease	18 (1%)	9 (1%)	19 (4%)	8 (2%)	641 (4%)	9 (2%)	25 (2%)	5 (3%)	0.24 (0.1 to 0.59)*	0.54 (0.33 to 0.87)*	0.63 (0.27 to 1.48)	0.47 (0.25 to 0.89)*	1.92 (0.7 to 5.29)	1.48 (0.52 to 4.23)	0.92 (0.05 to 1.78)*
Liver disease	3 (0%)	3 (0%)	NA (NA%)	2 (0%)	70 (0%)	2 (0%)	6 (0%)	1 (1%)	NA	0.53 (0.17 to 1.72)	0.51 (0.08 to 3.06)	0.38 (0.09 to 1.52)	4.6 (0.4 to 53.09)	1.19 (0.14 to 10.41)	0.45 (-1.26 to 2.15)
Chronic obstructive pulmonary disease	2 (0%)	2 (0%)	5 (3%)	1 (0%)	153 (1%)	1 (0%)	3 (0%)	2 (1%)	0.22 (0.04 to 1.39)	0.24 (0.06 to 0.99)*	0.76 (0.07 to 8.4)	0.59 (0.1 to 3.55)	1.98 (0.12 to 33.39)	12.03 (1.02 to 142.52)*	0.61 (-1.9 to 3.12)

## Sheet: S2 Severity scale
Table S2. Classification of severity of the acute phase of the SARS-CoV-2 infection.
Severity scale	N (%)	N women (%)	N men (%)	Severity category	N (%)	Self-assessment of severity of illness	Severity assessment by the Telehealth monitoring service	Intensity of treatment
1	229 (13.5%)	105 (12.0%)	124 (15.1%)	1	682 (40.1%)	No illness	Low	No physical assessment at LUH
2	463 (27.3%)	227 (26.0%)	236 (28.8%)			Mild	Low	No physical assessment at LUH
3	330 (19.%)	177 (20.3%)	4153 (18.7%)	2	468 (27.6%)	Moderate	Low	No physical assessment at LUH
4	138 (8.2%)	62 (7.1%)	76 (9.3%)			Severe	Low	No physical assessment at LUH
5	288 (17.0%)	161 (18.4%)	127 (15.5%)	3	449 (26.5%)	NA	Moderate/high	No physical assessment at LUH
6	161 (9.5%)	109 (12.5%)	52 (6.3%)			NA	NA	Evaluation at the Covid-19 clinic
7	65 (3.8%)	29 (3.3%)	36 (4.4%)	4	84 (5.0%)	NA	NA	Hospitalization
8	19 (1.1%)	4 (0.5%)	15 (1.8%)			NA	NA	Hospitalization ICU

## Sheet: S3a C19Q Symptoms
Table S3a. Symptoms from the C19Q questionnaire. The table shows the association of SARS-CoV-2 status, the severity scale and severity categories with recent symptoms, using logistic regression adjusting for age and sex. For logistic regression analysis, the recent symptoms are coded as 1 or 0 as is defined in the last column. The association between time since diagnosis and recent symptoms, was …
		SARS-CoV-2 cases (1) vs C19Q controls (0)								SARS-CoV-2 Severity Scale		SARS-CoV-2 severity category 1 vs 2								SARS-CoV-2 severity category 1 vs 3					SARS-CoV-2 severity category 1 vs 4					SARS-CoV-2 severity category 2 vs 3		SARS-CoV-2 severity category 2 vs 4		SARS-CoV-2 severity category 3 vs 4		Time since SARS-CoV-2 diagnosis		N for each answer among SARS-CoV-2 cases							N for each answer among C19Q controls
Variable	Symptom name	N SARS-CoV-2 cases with symptom	N SARS-CoV-2 cases without symptom	Fraction of SARS-CoV-2 cases with symptom (%)	N controls with symptom	N controls without symptom	Fraction of controls with symptom (%)	OR	P-value	OR	P-value	N in severity category 1 with symptom	N in severity category 1 without symptom	Fraction of severity category 1 with symptom (%)	N in severity category 2 with symptom	N in severity category 2 without symptom	Fraction of severity category 2 with symptom (%)	OR	P-value	N in severity category 3 with symptom	N in severity category 3 without symptom	Fraction of severity category 3 with symptom (%)	OR	P-value	N in severity category 4 with symptom	N in severity category 4 without symptom	Fraction of severity category 4 with symptom (%)	OR	P-value	OR	P-value	OR	P-value	OR	P-value	Effect	P-value	1	2	3	4	5	6	7	1	2	3	4	5
C19 EXERCISE MALAISE AFTER PHYSICAL STRESS	MALAISE AFTER PHYSICAL STRESS	605	1050	0.365559	197	1012	0.162945	3.16214	6.02365e-37	1.40046	4.33101e-28	150	519	0.224215	177	273	0.393333	2.22866	2.84614e-09	225	205	0.523256	3.55163	5.40584e-21	44	35	0.556962	4.11654	8.58509e-08	1.64757	0.000364249	2.23274	0.00280247	1.54226	0.100316	0.0313238	0.000342735	1050	429	115	61	0	0	0	1012	147	32	18	0
C19 SYMPTOM DYSPNEA	DYSPNEA	766	912	0.456496	277	974	0.221423	3.24592	1.28045e-45	1.3595	4.01188e-25	223	453	0.329882	214	240	0.471366	1.78902	3.38218e-06	261	178	0.594533	2.74725	4.08059e-15	57	23	0.7125	5.33591	1.78798e-10	1.54417	0.00162447	2.94571	7.73339e-05	1.96368	0.0141914	-0.00896447	0.389622	912	445	199	122	0	0	0	974	197	59	21	0
C19 SYMPTOM FATIGUE	FATIGUE	1207	473	0.718452	704	541	0.565462	2.02109	3.69756e-18	1.42805	1.97429e-24	407	273	0.598529	348	106	0.76652	2.20505	4.84186e-09	367	73	0.834091	3.34484	4.41354e-16	67	10	0.87013	6.19745	7.60828e-09	1.47637	0.02475	2.30026	0.0190121	2.08645	0.0453771	-0.0295508	0.0109519	473	565	350	292	0	0	0	541	442	168	94	0
C19 SYMPTOM WEAKNESS	WEAKNESS	751	932	0.446227	376	871	0.301524	1.98102	6.41541e-18	1.34521	1.20041e-23	204	474	0.300885	226	229	0.496703	2.27941	6.20589e-11	257	185	0.581448	2.94903	4.79663e-17	53	26	0.670886	4.20069	3.41325e-08	1.30445	0.0529985	1.7489	0.0393371	1.68374	0.0537123	-0.0190868	0.0609879	932	462	170	119	0	0	0	871	273	70	33	0
C19 SLEEP TIRED AWAKE	TIRED AWAKE	1204	463	0.722256	826	403	0.672091	1.197	0.0319786	1.35182	8.15964e-19	424	250	0.62908	342	110	0.756637	1.85963	4.96294e-06	357	77	0.822581	3.06427	5.30839e-14	62	17	0.78481	3.93566	1.96029e-06	1.66458	0.00284088	1.82557	0.0545745	1.47119	0.238521	-0.0185078	0.05344	463	753	332	119	0	0	0	403	556	192	78	0
C19 GEN HEALTH HEALTH STATUS EST	WORSE STATE OF HEALTH	203	1481	0.120546	141	1094	0.11417	1.07405	0.544758	1.47136	9.32639e-19	44	634	0.0648968	45	414	0.0980392	1.55063	0.0485569	91	349	0.206818	3.92714	1.90128e-12	21	57	0.269231	6.82009	6.40498e-08	2.41182	6.93972e-06	3.95861	8.32284e-05	2.07796	0.0195479	0.0294269	0.00416998	203	701	577	161	42	0	0	174	550	370	113	28
C19 SYMPTOM IMBALANCE	LOSS OF BALANCE OR COORDINATION	364	1305	0.218095	170	1076	0.136437	1.9684	2.52928e-11	1.35597	1.3574e-18	92	584	0.136095	80	367	0.178971	1.3492	0.077135	150	290	0.340909	2.86064	5.23263e-12	35	43	0.448718	4.31024	3.18123e-07	2.20601	7.66279e-07	3.81626	4.55226e-06	1.58426	0.0855778	0.00575067	0.425416	1305	250	85	29	0	0	0	1076	125	36	9	0
C19 SYMPTOM DISCOMFORT STANDING	DISCOMFORT STANDING	396	1280	0.236277	244	997	0.196616	1.38254	0.000520369	1.34375	2.76487e-18	95	581	0.140533	115	337	0.254425	2.06493	3.88281e-06	141	299	0.320455	2.50732	2.15008e-09	38	41	0.481013	5.01455	2.36588e-08	1.33505	0.0584824	3.45844	1.26424e-05	2.30064	0.00192877	0.00593962	0.497344	1280	215	110	71	0	0	0	997	161	49	34	0
C19 SYMPTOM MEMORY IMPAIRMENT	MEMORY DISTURBANCE	776	891	0.465507	281	963	0.225884	3.51997	1.77672e-50	1.29868	4.70869e-18	234	441	0.346667	210	239	0.467706	1.63653	0.000126863	260	176	0.59633	2.42473	1.6605e-11	56	22	0.717949	4.47483	3.7651e-08	1.50235	0.0038936	2.64084	0.000567034	2.10086	0.00878328	-0.0115677	0.26787	891	423	229	124	0	0	0	963	196	58	27	0
C19 EXERCISE EXERCISES	DISCOMFORT EXERCISING	873	673	0.564683	473	655	0.419326	1.82178	8.88481e-14	1.3007	3.68805e-17	275	341	0.446429	249	167	0.598558	1.86604	1.6285e-06	282	132	0.681159	2.62926	1.04088e-12	52	20	0.722222	4.02573	5.4182e-07	1.43071	0.0166246	2.1438	0.00904635	1.64354	0.0919035	-0.0111036	0.53202	673	47	257	262	124	0	0	655	34	152	92	44
C19 SYMPTOM DIZZINESS	DIZZINESS	537	1139	0.320406	285	969	0.227273	1.64314	7.78404e-09	1.28899	2.62448e-16	158	520	0.233038	145	308	0.320088	1.54275	0.00170536	185	253	0.422374	2.30732	1.06331e-09	43	36	0.544304	5.10649	1.22139e-09	1.52084	0.00353615	3.29127	1.26912e-05	1.91422	0.0134791	-0.00839617	0.2924	1139	383	121	33	0	0	0	969	224	47	14	0
C19 GEN HEALTH DIFF WALKING 1FLOOR	DIFFICULTY WALKING 1 FLOOR	221	1464	0.131157	88	1153	0.0709106	2.24026	5.08992e-10	1.40432	8.34219e-16	52	627	0.0765832	43	414	0.0940919	1.21241	0.38052	90	351	0.204082	2.69434	1.24446e-07	31	48	0.392405	7.72429	1.32271e-10	2.2771	3.92066e-05	10.6017	1.47347e-11	2.85784	0.000324004	-0.00106084	0.812364	1464	193	27	1	0	0	0	1153	79	7	2	0
C19 SYMPTOM ABDOMINAL PAIN	ABDOMINAL PAIN	376	1297	0.224746	218	1032	0.1744	1.35069	0.00193435	1.3157	6.53971e-15	103	574	0.152142	104	346	0.231111	1.69082	0.000907703	134	304	0.305936	2.53066	2.88961e-09	28	51	0.35443	5.2413	7.99189e-08	1.54092	0.00638476	2.96675	0.000300566	2.12296	0.00995168	0.00190051	0.781702	1297	270	88	18	0	0	0	1032	170	35	13	0
C19 SYMPTOM CHEST PAIN	CHEST PAIN	468	1208	0.279236	180	1070	0.144	2.38302	7.60566e-20	1.28065	7.38266e-15	121	555	0.178994	134	317	0.297118	1.91839	6.50163e-06	172	269	0.390023	2.80467	3.83776e-13	33	46	0.417722	3.90698	1.1846e-06	1.46429	0.00837336	1.95126	0.0157517	1.35982	0.245521	-8.27601e-05	0.991989	1208	314	108	46	0	0	0	1070	150	22	8	0
C19 GEN HEALTH SLEEP QUALITY	CHANGE IN SLEEP QUALITY TO THE WORSE	428	1223	0.259237	147	1072	0.120591	2.50362	1.19936e-19	1.28272	3.01925e-14	117	548	0.17594	127	323	0.282222	1.84483	2.87553e-05	149	282	0.345708	2.4266	1.57394e-09	29	49	0.371795	3.04797	0.000100367	1.36616	0.0359612	1.73672	0.0511219	1.35268	0.270576	0.000283669	0.968755	8	72	1143	346	82	0	0	19	76	977	129	18
C19 SYMPTOM SOUND SENSITIVITY	SOUND SENSITIVITY	277	1397	0.165472	142	1102	0.114148	1.63237	1.12059e-05	1.33937	3.51422e-14	67	610	0.098966	67	384	0.148559	1.55483	0.0186483	114	324	0.260274	2.90232	4.4354e-10	25	54	0.316456	5.30032	3.04765e-07	1.85925	0.000391426	3.37585	0.000181632	1.91071	0.0304429	0.00076656	0.910504	1397	174	74	29	0	0	0	1102	98	37	7	0
C19 GEN HEALTH HEALTH WORRIES	HEALTH WORRIES	358	1325	0.212715	259	978	0.209378	1.01532	0.869955	1.29827	5.08249e-14	93	586	0.136966	101	355	0.221491	1.7871	0.000264225	129	310	0.29385	2.65575	3.66352e-10	26	54	0.325	3.3979	4.26461e-05	1.46174	0.0157919	1.96735	0.021685	1.41471	0.215456	-0.000126266	0.993979	301	340	372	312	297	44	17	198	214	300	266	217
C19 EXERCISE MALAISE AFTER MENTAL STRESS	MALAISE AFTER MENTAL STRESS	669	935	0.417082	474	710	0.400338	1.01609	0.84446	1.25626	1.04097e-13	213	435	0.328704	195	237	0.451389	1.70685	4.65834e-05	217	205	0.514218	2.23469	2.05781e-09	36	42	0.461538	2.56966	0.000473553	1.39464	0.0221949	1.97554	0.0160957	1.4164	0.205039	0.000914883	0.913463	935	506	121	42	0	0	0	710	390	63	21	0
C19 SYMPTOM LACK OF CONCENTRATION	LACK OF CONCENTRATION	974	699	0.582188	455	791	0.365169	2.45156	7.81777e-31	1.24821	1.51961e-13	326	351	0.481536	287	165	0.634956	1.87855	4.58999e-07	294	143	0.672769	2.22584	9.28504e-10	53	25	0.679487	3.18131	1.26148e-05	1.20422	0.199746	1.66027	0.0697578	1.49433	0.1515	-0.0156242	0.148171	699	530	299	145	0	0	0	791	283	120	52	0
C19 SYMPTOM PHOTOSENSITIVITY	LIGHT SENSITIVITY	326	1350	0.194511	181	1067	0.145032	1.44494	0.000314589	1.30673	1.93324e-13	90	589	0.132548	88	363	0.195122	1.56691	0.00690629	112	325	0.256293	2.18748	1.53897e-06	30	50	0.375	5.22452	3.37342e-08	1.47996	0.0188766	4.06676	3.97787e-06	2.93729	0.000216519	0.00568402	0.437896	1350	208	83	35	0	0	0	1067	138	33	10	0
C19 SYMPTOM MUSCLE PAIN	MUSCLE PAIN	684	993	0.407871	439	815	0.35008	1.42406	9.09402e-06	1.23897	5.70891e-13	196	484	0.288235	208	246	0.45815	2.07914	1.22873e-08	225	211	0.516055	2.31977	1.26455e-10	45	33	0.576923	2.78377	8.95903e-05	1.13375	0.366053	1.51576	0.124245	1.50259	0.12696	-0.000181223	0.986605	993	353	181	150	0	0	0	815	230	125	84	0
C19 SYMPTOM JOINT PAIN	JOINT PAIN	810	861	0.48474	533	721	0.42504	1.51572	1.45904e-07	1.24147	9.12621e-13	243	432	0.36	235	218	0.518764	1.93395	2.33708e-07	259	177	0.594037	2.14553	6.5397e-09	57	21	0.730769	3.16109	2.83418e-05	1.13473	0.37336	1.99584	0.0161727	1.72037	0.0586258	-0.00146622	0.89796	861	375	228	207	0	0	0	721	269	137	127	0
C19 SYMPTOM HAND TREMOR	HAND TREMOR	229	1446	0.136716	133	1108	0.107172	1.3076	0.0211535	1.33563	2.88914e-12	51	624	0.0755556	68	386	0.14978	2.208	5.50437e-05	84	354	0.191781	2.92605	1.79788e-08	19	61	0.2375	4.22974	4.03582e-05	1.42799	0.0515598	2.91931	0.00179253	1.52494	0.179915	0.00731719	0.270858	1446	142	56	31	0	0	0	1108	73	35	25	0
C19 SYMPTOM MOOD SWINGS	MOOD SWINGS	520	1151	0.311191	307	935	0.247182	1.30958	0.00168271	1.24107	8.27479e-12	157	518	0.232593	160	291	0.354767	1.84633	7.03387e-06	158	280	0.360731	1.97876	1.43173e-06	32	47	0.405063	3.4788	9.33596e-06	1.12673	0.41001	1.79858	0.0336531	1.77161	0.0361227	-0.00786848	0.275015	1151	409	93	18	0	0	0	935	254	48	5	0
C19 SYMPTOM HEADACHE	HEADACHE	795	888	0.472371	523	724	0.419407	1.20058	0.0201629	1.22154	2.18041e-11	261	418	0.384389	237	220	0.5186	1.76413	7.19331e-06	247	192	0.562642	2.12355	7.70657e-09	38	41	0.481013	2.46613	0.000733292	1.20947	0.177268	1.4311	0.193125	1.12272	0.666885	-0.0080946	0.375084	888	555	157	83	0	0	0	724	380	108	35	0
C19 GEN HEALTH SLEEP QUALITY	WORSE SLEEP QUALITY	500	1170	0.299401	349	886	0.282591	1.03878	0.651412	1.23256	2.86532e-11	159	513	0.236607	140	313	0.309051	1.4427	0.00759303	166	271	0.379863	2.01405	4.25849e-07	28	52	0.35	2.24937	0.00379277	1.49161	0.00595141	1.63294	0.0827444	1.28901	0.356787	0.0011466	0.88044	175	995	438	62	0	0	0	167	719	302	47	0
C19 SYMPTOM SINUS PRESSURE	SINUS PRESSURE	313	1354	0.187762	202	1038	0.162903	1.2243	0.0432136	1.27038	4.04019e-11	75	596	0.111773	94	356	0.208889	2.07815	1.42697e-05	116	321	0.265446	2.67871	2.80106e-09	23	57	0.2875	3.59772	5.38738e-05	1.25662	0.161756	1.60283	0.12094	1.33121	0.33107	-0.000554786	0.934663	1354	224	64	25	0	0	0	1038	151	33	18	0
C19 SYMPTOM PAROXYSMAL NOCTURNAL DYSPNEA	PAROXYSMAL NOCTURNAL DYSPNEA	133	1549	0.0790725	33	1221	0.0263158	3.31716	4.156e-11	1.37355	4.89505e-10	28	653	0.041116	28	425	0.0618102	1.51664	0.131095	65	375	0.147727	3.88665	2.78576e-09	11	68	0.139241	3.18989	0.00845521	2.58211	4.3476e-05	3.28107	0.00790815	0.845624	0.646698	-0.00581766	0.185737	1549	97	30	6	0	0	0	1221	23	6	4	0
C19 SYMPTOM VISUAL DISTURBANCES	VISUAL DISTURBANCES	325	1343	0.194844	147	1105	0.117412	1.92775	6.60179e-10	1.25118	5.11436e-10	92	579	0.137109	81	372	0.178808	1.33743	0.0840581	120	318	0.273973	2.21814	5.28356e-07	24	53	0.311688	3.07773	0.000253442	1.64164	0.00282335	2.20478	0.0111513	1.52264	0.148663	0.00227732	0.749249	1343	219	75	31	0	0	0	1105	101	35	11	0
C19 SYMPTOM NUMBNESS IN THE HANDS OR FEET	NUMBNESS IN HANDS OR FEET	504	1170	0.301075	283	965	0.226763	1.60595	5.12208e-08	1.21209	5.76563e-10	145	531	0.214497	148	304	0.327434	1.75747	4.94658e-05	170	269	0.387244	2.07173	1.53175e-07	34	44	0.435897	2.50615	0.000718799	1.19386	0.215791	1.28337	0.35826	1.27978	0.350192	-0.00158543	0.861723	1170	305	126	73	0	0	0	965	171	63	49	0
C19 SYMPTOM NECK PAIN	NECK PAIN	434	1238	0.259569	323	930	0.257781	1.09276	0.311667	1.22026	1.17862e-09	115	563	0.169617	137	312	0.305122	2.1444	2.02013e-07	148	289	0.338673	2.17391	1.65358e-07	26	53	0.329114	2.1951	0.00688938	1.01698	0.910799	1.05143	0.860901	1.16645	0.587755	0.0116523	0.182333	1238	251	118	65	0	0	0	930	183	82	58	0
C19 SYMPTOM ORTHOSTATIC HYPOTENSION	DIZZINESS STANDING UP	601	1075	0.358592	344	905	0.27542	1.42995	1.28059e-05	1.1998	1.68226e-09	206	469	0.305185	166	286	0.367257	1.33437	0.0278853	184	257	0.417234	1.72991	4.00658e-05	38	41	0.481013	3.22548	1.13426e-05	1.32518	0.0464684	2.19645	0.00360824	1.6342	0.0603347	-0.0125477	0.118576	1075	452	113	36	0	0	0	905	283	50	11	0
C19 SYMPTOM SHIVER	CHILLS	469	1118	0.295526	197	791	0.199393	1.68839	7.45875e-08	1.21629	2.33162e-09	138	511	0.212635	145	283	0.338785	1.89221	8.43238e-06	153	260	0.37046	2.17738	1.23765e-07	26	49	0.346667	3.14541	0.000154356	1.1564	0.330435	1.38184	0.265963	1.2974	0.361453	-0.00758366	0.341981	1118	340	96	33	0	0	0	791	158	31	8	0
C19 SYMPTOM EDEMA	EDEMA	370	1289	0.223026	286	961	0.22935	1.11414	0.249622	1.23023	3.38283e-09	99	575	0.146884	106	345	0.235033	1.7763	0.000403555	129	300	0.300699	1.99452	1.24498e-05	31	47	0.397436	2.74506	0.000577794	1.16454	0.347041	2.19829	0.00899916	1.78877	0.0414655	-0.00758578	0.353984	1289	212	100	58	0	0	0	961	201	48	37	0
C19 SYMPTOM TACHYCARDIA	TACHYCARDIA	510	1159	0.305572	225	1027	0.179712	2.20626	4.97153e-18	1.2052	3.55744e-09	160	517	0.236337	140	311	0.310421	1.42799	0.0106737	167	268	0.383908	1.78826	3.1373e-05	34	43	0.441558	2.60255	0.000525698	1.31365	0.0639309	2.18474	0.00557247	1.69721	0.0536024	-0.0100672	0.166173	1159	396	92	22	0	0	0	1027	194	27	4	0
C19 SYMPTOM BURNING EYES	BURNING EYES	395	1269	0.23738	226	1028	0.180223	1.53977	4.36797e-06	1.21237	7.94798e-09	117	559	0.173077	96	352	0.214286	1.28243	0.109399	140	294	0.322581	2.0349	1.50959e-06	32	46	0.410256	2.9708	0.000100594	1.58822	0.00315605	2.01369	0.0145792	1.53864	0.113789	-0.00824524	0.253569	1269	295	69	31	0	0	0	1028	167	43	16	0
C19 SYMPTOM WORSENED SIGHT	WORSENED SIGHT	557	1011	0.35523	239	981	0.195902	2.57105	4.77859e-26	1.19684	8.38821e-09	179	462	0.279251	149	276	0.350588	1.37952	0.0196884	183	225	0.448529	1.80477	1.64936e-05	39	31	0.557143	2.33048	0.00206169	1.2915	0.08313	1.63614	0.0879497	1.79626	0.0383487	0.0113919	0.250001	1011	257	245	55	0	0	0	981	151	71	17	0
C19 SYMPTOM NAUSEA	NAUSEA	274	1400	0.16368	158	1091	0.126501	1.25571	0.0412853	1.2666	9.47572e-09	85	593	0.125369	76	375	0.168514	1.43779	0.04295	90	348	0.205479	2.06902	5.22981e-05	17	61	0.217949	4.47414	4.75632e-05	1.40955	0.0638588	2.9614	0.00293914	2.47576	0.0109157	0.0011804	0.840134	1400	201	61	12	0	0	0	1091	133	17	8	0
C19 SYMPTOM PALPITATIONS	PALPITATIONS	424	1230	0.256348	207	1038	0.166265	1.93622	5.1129e-12	1.20699	1.42048e-08	126	552	0.185841	114	332	0.255605	1.47465	0.00942805	147	278	0.345882	1.95272	5.2904e-06	27	49	0.355263	1.90122	0.0265255	1.40637	0.027108	1.8754	0.034669	1.21088	0.503251	-0.00124853	0.862767	1230	320	77	27	0	0	0	1038	175	21	11	0
C19 GEN HEALTH DIFF WALKING 400M	DIFFICULTY WALKING 400M	164	1513	0.0977937	87	1147	0.0705024	1.59556	0.000728112	1.30333	1.72406e-08	44	633	0.0649926	31	424	0.0681319	1.01121	0.963754	67	370	0.153318	2.32654	4.53204e-05	20	59	0.253165	4.17229	5.40225e-05	2.37831	0.000135219	5.81391	4.87723e-06	2.25814	0.0124294	0.000764784	0.858324	1513	138	21	5	0	0	0	1147	59	21	7	0
C19 SYMPTOM SORE THROAT	SORE THROAT	330	1329	0.198915	265	985	0.212	0.934217	0.468587	1.21169	7.29359e-08	93	577	0.138806	97	351	0.216518	1.69494	0.00104582	111	322	0.256351	2.00169	1.58716e-05	24	55	0.303797	2.72535	0.000934341	1.16279	0.359237	1.87776	0.0398683	1.7171	0.0701864	0.00216159	0.755496	1329	239	62	29	0	0	0	985	217	37	11	0
C19 SYMPTOM BACK PAIN	BACK PAIN	844	840	0.501188	628	626	0.500797	1.00723	0.92383	1.16337	1.43638e-07	285	392	0.420975	247	210	0.540481	1.60975	9.43628e-05	248	194	0.561086	1.74199	1.06566e-05	49	30	0.620253	2.33037	0.00089282	1.11218	0.438143	1.63303	0.0664309	1.56384	0.0894008	0.0121227	0.271778	840	476	213	155	0	0	0	626	372	129	127	0
C19 SYMPTOM DRY MOUTH	DRY MOUTH	477	1192	0.2858	297	961	0.236089	1.3931	0.000129284	1.17116	4.88581e-07	147	528	0.217778	137	314	0.303769	1.55232	0.00159275	146	292	0.333333	1.62311	0.000620523	36	42	0.461538	2.56197	0.000422855	1.08434	0.582445	1.7471	0.0396532	1.85608	0.0209996	0.0148012	0.0901402	1192	288	133	56	0	0	0	961	205	65	27	0
C19 SYMPTOM SHORTNESS OF BREATH	SHORTNESS OF BREATH MRC	1225	406	0.751073	781	420	0.650291	1.6545	3.04406e-09	1.19175	4.91506e-07	452	204	0.689024	349	97	0.782511	1.61447	0.000763877	338	85	0.799054	1.68709	0.000516298	66	12	0.846154	3.15887	0.000248036	1.01967	0.909895	1.79323	0.0904022	1.72995	0.110642	0.0135354	0.253081	406	589	485	88	39	24	0	420	423	313	26	13
C19 SYMPTOM COUGH	COUGH	532	1150	0.31629	360	895	0.286853	1.20577	0.0228868	1.16357	5.83582e-07	166	515	0.243759	153	301	0.337004	1.57552	0.000686543	168	270	0.383562	1.83778	7.0825e-06	34	46	0.425	2.21339	0.00257709	1.16076	0.295192	1.30163	0.325975	1.0925	0.735641	0.00635573	0.436335	1150	386	102	44	0	0	0	895	273	54	33	0
C19 SLEEP NIGHTMARES	NIGHTMARES	291	1381	0.174043	170	1063	0.137875	1.19385	0.099183	1.21734	6.58698e-07	91	585	0.134615	89	362	0.197339	1.62912	0.00369066	87	350	0.199085	1.95584	0.000136426	14	66	0.175	2.62011	0.00901636	1.19723	0.310379	1.5929	0.193998	1.62482	0.17655	-0.00757206	0.181706	1381	225	61	5	0	0	0	1063	136	30	4	0
C19 SYMPTOM LOSS OF APPETITE	LOSS OF APPETITE	278	1397	0.16597	133	1119	0.10623	1.57083	7.929e-05	1.21973	7.00818e-07	83	597	0.122059	85	367	0.188053	1.72478	0.00178331	86	349	0.197701	2.11144	3.75762e-05	18	61	0.227848	4.89926	1.18236e-05	1.15937	0.406685	2.00531	0.0387785	2.17501	0.0209773	-0.00201147	0.758757	1397	187	65	26	0	0	0	1119	104	22	7	0
C19 SYMPTOM TEMPERATURE	TEMPERATURE	154	1521	0.0919403	48	1235	0.0374123	2.85113	6.04445e-11	1.26107	8.13901e-07	37	642	0.0544919	38	414	0.0840708	1.58126	0.0592019	58	379	0.132723	2.27579	0.000213638	19	60	0.240506	2.89932	0.00298343	1.43268	0.107959	2.59017	0.00856195	1.59287	0.157342	-0.0049556	0.436115	1521	75	41	38	0	0	0	1235	40	8	0	0
C19 SYMPTOM DIARRHEA	DIARRHEA	382	1298	0.227381	239	1012	0.191047	1.24563	0.0181949	1.18046	8.34295e-07	121	559	0.177941	108	346	0.237885	1.44058	0.0148923	118	319	0.270023	1.7221	0.000339109	29	51	0.3625	3.31272	2.8898e-05	1.19225	0.262227	1.93467	0.0206923	1.86246	0.0260818	0.0046236	0.47628	1298	300	70	12	0	0	0	1012	199	26	14	0
C19 SYMPTOM DRY EYES	DRY EYES	511	1164	0.305075	320	937	0.254574	1.42767	3.33416e-05	1.16341	1.41392e-06	156	521	0.230428	141	311	0.311947	1.4822	0.004745	171	267	0.390411	1.81134	2.08881e-05	30	49	0.379747	1.89846	0.0207482	1.23144	0.154632	1.184	0.543738	1.0243	0.9305	-0.00893826	0.32202	1164	313	121	77	0	0	0	937	201	77	42	0
C19 SYMPTOM FLANK PAIN	FLANK PAIN	254	1413	0.15237	160	1085	0.128514	1.35165	0.00617762	1.2062	1.53181e-06	61	618	0.089838	75	374	0.167038	2.00777	0.000176696	89	345	0.205069	2.21731	1.28207e-05	23	56	0.291139	3.53449	0.000111667	1.15782	0.408563	1.66876	0.0990784	1.97393	0.0274631	-0.000279248	0.963522	1413	186	48	20	0	0	0	1085	118	30	12	0
C19 SLEEP USES MEDICATIONS	USES SLEEP MEDICATIONS	269	1389	0.162244	199	1027	0.162316	1.12219	0.269964	1.19513	2.85271e-06	73	598	0.108793	72	374	0.161435	1.55631	0.0145961	94	341	0.216092	1.92556	0.000161793	23	55	0.294872	2.48011	0.00374797	1.25584	0.199435	1.66871	0.102226	1.55493	0.144859	-0.000133136	0.989003	1389	98	42	129	0	0	0	1027	82	19	98	0
C19 SYMPTOM SWOLLEN OR STIFF JOINTS	SWOLLEN OR STIFF JOINTS	671	1000	0.401556	461	790	0.368505	1.32687	0.000424812	1.14779	4.27546e-06	206	472	0.303835	204	246	0.453333	1.91603	6.59422e-07	212	223	0.487356	1.77182	1.87868e-05	37	42	0.468354	1.31472	0.303307	0.96355	0.792272	0.805365	0.42191	0.848691	0.537955	0.00172946	0.871381	1000	346	177	148	0	0	0	790	253	116	92	0
C19 SYMPTOM HEAVIER SINCE C19	HEAVIER SINCE BEFORE PANDEMIC	857	742	0.53596	551	655	0.456882	1.36986	4.89922e-05	1.14283	6.78942e-06	310	336	0.479876	238	198	0.545872	1.30039	0.034601	255	163	0.610048	1.69516	4.72532e-05	41	30	0.577465	1.71909	0.0405163	1.26883	0.092805	1.27062	0.386597	1.06905	0.808777	0.0355909	0.0428368	742	234	250	166	167	40	0	655	200	157	89	78
C19 SYMPTOM NIGHT SWEATS	NIGHT SWEATS	543	1119	0.326715	331	920	0.264588	1.42719	2.32412e-05	1.14423	1.17965e-05	173	499	0.25744	157	294	0.348115	1.5154	0.00204059	178	256	0.410138	1.75293	3.78566e-05	29	48	0.376623	1.72252	0.0485961	1.17306	0.265198	1.1577	0.59862	1.02333	0.932917	0.0136606	0.108673	1119	370	122	51	0	0	0	920	254	54	23	0
C19 SYMPTOM IMPAIRED TASTE	IMPAIRED OR DISTURBED TASTE	378	1290	0.226619	42	1201	0.0337892	9.07828	3.46832e-59	1.1612	1.34003e-05	114	562	0.168639	112	338	0.248889	1.60287	0.00197488	126	310	0.288991	1.78547	0.000137958	18	60	0.230769	1.62387	0.128074	1.13053	0.433634	1.1185	0.724509	0.857469	0.613801	-0.0260053	0.00940735	1290	173	76	129	0	0	0	1201	29	6	7	0
C19 SYMPTOM HEAT INTOLERANCE	HEAT INTOLERANCE	173	1483	0.104469	96	1143	0.0774818	1.5482	0.00115549	1.2233	1.46615e-05	45	628	0.0668648	50	395	0.11236	1.71531	0.0133003	68	366	0.156682	2.23683	9.07169e-05	8	68	0.105263	1.26541	0.597907	1.35795	0.137351	1.22048	0.661292	0.883036	0.766326	-0.00561406	0.339971	1483	101	51	21	0	0	0	1143	67	18	11	0
C19 SLEEP UNRESTED AFTER SLEEP	UNRESTED AFTER SLEEP	1351	310	0.813365	952	276	0.775244	1.19078	0.0643279	1.1766	1.54901e-05	525	148	0.780089	373	80	0.8234	1.31687	0.0741055	368	62	0.855814	1.72592	0.00107399	64	14	0.820513	1.6785	0.100536	1.37931	0.0880455	1.29857	0.44422	1.13525	0.716312	-0.0059025	0.57079	310	710	425	216	0	0	0	276	489	314	149	0
C19 SYMPTOM HEARTBURN	HEARTBURN	435	1239	0.259857	271	982	0.216281	1.34271	0.000938796	1.14892	1.58754e-05	142	537	0.209131	110	342	0.243363	1.19784	0.216315	144	291	0.331034	1.72409	0.000126309	30	49	0.379747	2.07036	0.00796424	1.4411	0.0161724	1.6602	0.0731436	1.37888	0.235677	0.0127598	0.0765933	1239	329	81	25	0	0	0	982	212	39	20	0
C19 SYMPTOM CONSTIPATION	CONSTIPATION	332	1344	0.198091	258	994	0.20607	1.03041	0.753555	1.16488	1.98224e-05	96	581	0.141802	96	355	0.21286	1.60539	0.0036574	110	330	0.25	1.75422	0.00045951	20	59	0.253165	2.02203	0.0275864	1.11428	0.508635	1.28713	0.424183	0.898423	0.720493	-0.00756496	0.240946	1344	251	62	19	0	0	0	994	210	39	9	0
C19 SYMPTOM CALF CRAMPS	CALF CRAMPS	286	1391	0.170543	179	1066	0.143775	1.33367	0.00580895	1.16854	2.29539e-05	91	589	0.133824	70	381	0.155211	1.18006	0.339441	96	344	0.218182	1.59649	0.00467954	26	52	0.333333	2.11824	0.0108216	1.40204	0.0557374	2.46633	0.00333815	1.55429	0.128291	0.00423357	0.488604	1391	214	57	15	0	0	0	1066	142	34	3	0
C19 SYMPTOM NASAL CONGESTION	NASAL CONGESTION	589	1077	0.353541	423	815	0.34168	1.00587	0.941568	1.1354	2.37825e-05	216	457	0.320951	160	294	0.352423	1.17586	0.211415	168	266	0.387097	1.48621	0.00289272	36	42	0.461538	2.41879	0.000800193	1.21651	0.167286	2.2079	0.00374092	1.46811	0.143161	-0.0085537	0.364125	1077	381	131	77	0	0	0	815	288	74	61	0
C19 SYMPTOM FREQUENT URINATION	FREQUENT URINATION	478	1192	0.286228	286	956	0.230274	1.46995	1.06216e-05	1.14152	2.43274e-05	151	525	0.223373	138	309	0.308725	1.55595	0.00154777	134	305	0.305239	1.37257	0.0268168	42	37	0.531646	2.77303	9.82816e-05	0.919668	0.574373	1.90921	0.0159775	2.2184	0.00246692	-0.00112367	0.905287	1192	277	112	89	0	0	0	956	147	81	58	0
C19 SYMPTOM EXCESSIVE SWEATING	EXCESSIVE SWEATING	368	1307	0.219701	181	1067	0.145032	1.78602	6.52529e-09	1.14896	5.00957e-05	113	565	0.166667	110	343	0.242826	1.57755	0.00285441	119	316	0.273563	1.67181	0.000807041	22	58	0.275	1.94246	0.0286232	1.04595	0.77665	1.17991	0.58638	1.12092	0.698545	0.0111157	0.180623	1307	228	75	65	0	0	0	1067	125	38	18	0
C19 SYMPTOM DIFFICULTY SWALLOWING	DIFFICULTY SWALLOWING	186	1477	0.111846	78	1165	0.0627514	2.01283	3.35307e-07	1.19018	6.82877e-05	48	624	0.0714286	54	394	0.120536	1.75565	0.00717731	65	373	0.148402	2.03029	0.000529488	17	61	0.217949	3.14242	0.00146989	1.13826	0.521284	1.70038	0.129642	1.3186	0.405531	-0.00496598	0.370578	1477	135	31	20	0	0	0	1165	63	11	4	0
C19 SYMPTOM HAIR LOSS	HAIR LOSS	283	1378	0.170379	154	1085	0.124294	1.55808	9.63404e-05	1.17237	9.05505e-05	87	584	0.129657	80	370	0.177778	1.42281	0.0496936	97	338	0.222989	1.78142	0.00111266	16	61	0.207792	3.35156	0.0015708	1.20278	0.310939	1.77833	0.121068	1.74227	0.125166	-0.0007283	0.930543	1378	119	86	78	0	0	0	1085	78	38	38	0
C19 SLEEP EARLY WAKEUP	EARLY WAKEUP	903	757	0.543976	639	575	0.526359	1.23201	0.00798889	1.12524	0.000106039	318	355	0.472511	246	203	0.547884	1.36082	0.015538	274	160	0.631336	1.57738	0.000629266	49	27	0.644737	1.07547	0.791749	1.27082	0.0954135	0.937225	0.818044	0.752219	0.312958	-0.0190903	0.0527169	757	559	243	101	0	0	0	575	411	160	68	0
C19 SLEEP DIFFICULT FALLING ASLEEP	DIFFICULT FALLING ASLEEP	979	709	0.579976	662	582	0.532154	1.18579	0.0258254	1.11744	0.00013392	356	326	0.521994	285	172	0.623632	1.51934	0.000707172	275	167	0.622172	1.52577	0.000917672	45	34	0.56962	1.45851	0.136665	1.03084	0.829614	1.01936	0.942881	1.00484	0.985376	0.0042083	0.709551	709	519	278	182	0	0	0	582	397	156	109	0
C19 SYMPTOM IMPAIRED SMELL	IMPAIRED OR DISTURBED SMELL	525	1140	0.315315	52	1191	0.0418343	11.371	6.41333e-90	1.12552	0.000143894	170	503	0.2526	155	294	0.345212	1.53403	0.00154159	171	266	0.391304	1.73604	5.43263e-05	20	58	0.25641	1.09882	0.748184	1.13456	0.380907	0.745177	0.319766	0.65369	0.140343	-0.0415151	0.00030081	1140	228	108	189	0	0	0	1191	31	10	11	0
C19 SYMPTOM EAR PAIN	EAR PAIN	254	1385	0.154973	117	1072	0.098402	1.65051	2.16804e-05	1.15915	0.000193815	80	586	0.12012	72	376	0.160714	1.39567	0.0596795	82	343	0.192941	1.75182	0.00147669	16	58	0.216216	2.51763	0.00786304	1.22076	0.273451	1.98619	0.0505295	1.41835	0.292472	-0.00328344	0.59428	1385	189	46	19	0	0	0	1072	88	20	9	0
C19 SYMPTOM TINNITUS	TINNITUS	594	1071	0.356757	337	918	0.268526	1.59974	1.07077e-08	1.11567	0.000225402	188	488	0.278107	188	262	0.417778	1.8611	1.49045e-06	173	257	0.402326	1.60716	0.000396882	32	48	0.4	1.40982	0.189863	0.895294	0.42927	0.820591	0.458042	0.939176	0.811036	0.0122985	0.265526	1071	310	120	164	0	0	0	918	163	48	126	0
C19 SYMPTOM HOARSENESS	HOARSENESS	310	1350	0.186747	135	1101	0.109223	2.1073	1.08499e-11	1.13808	0.000314	97	574	0.14456	81	369	0.18	1.28035	0.139548	104	330	0.239631	1.56558	0.00571451	24	56	0.3	1.59268	0.117491	1.25368	0.184859	1.31053	0.374142	1.24434	0.465578	-0.00949909	0.156657	1350	217	70	23	0	0	0	1101	102	23	10	0
C19 SYMPTOM RUNNY NOSE	RUNNY NOSE	743	921	0.446514	549	691	0.442742	0.990406	0.899461	1.10873	0.000347063	268	407	0.397037	214	236	0.475556	1.37879	0.00918374	202	232	0.465438	1.33338	0.024406	46	32	0.589744	2.6554	0.000141524	0.956957	0.748885	1.60689	0.0744225	1.8253	0.0219576	-0.000312163	0.975208	921	476	166	101	0	0	0	691	401	97	51	0
C19 SYMPTOM PHLEGM	PHLEGM	82	1587	0.0491312	48	1202	0.0384	1.39982	0.0698956	1.25862	0.000407879	18	659	0.0265879	23	427	0.0511111	1.92785	0.0405992	30	406	0.0688073	2.48478	0.00290685	8	71	0.101266	4.48391	0.00467989	1.2351	0.468117	2.02833	0.157997	1.76563	0.224748	0.000269369	0.945643	1587	54	19	9	0	0	0	1202	28	14	6	0
C19 SLEEP LONG WAKEUPS	LONG WAKEUPS	868	716	0.54798	616	542	0.531952	1.22254	0.0126646	1.11488	0.00047127	314	322	0.493711	229	209	0.522831	1.09538	0.478558	263	147	0.641463	1.48308	0.003849	48	26	0.648649	1.2191	0.473977	1.40924	0.0186915	1.20742	0.50374	0.805132	0.44545	-0.0143011	0.213342	716	455	238	175	0	0	0	542	331	155	130	0
C19 SYMPTOM ITCHING	ITCHING	419	1255	0.250299	249	1001	0.1992	1.38763	0.000307567	1.10595	0.00197626	129	549	0.190265	134	317	0.297118	1.77726	5.62621e-05	124	314	0.283105	1.52765	0.00418063	21	58	0.265823	1.24893	0.450438	0.887826	0.429683	0.841209	0.554913	0.892619	0.695068	-0.010823	0.194472	1255	262	106	51	0	0	0	1001	171	54	24	0
C19 SYMPTOM URINARY INCONTINENCE	URINARY INCONTINENCE	190	1490	0.113095	165	1077	0.13285	0.977038	0.84483	1.14089	0.00293818	53	625	0.0781711	50	403	0.110375	1.42893	0.0983546	67	374	0.151927	1.62	0.0169831	17	63	0.2125	2.03609	0.0483898	1.09876	0.654717	1.17189	0.669138	1.03623	0.917809	-0.00286238	0.610082	1490	132	34	24	0	0	0	1077	106	36	23	0
C19 SYMPTOM ERECTILE DYSFUNCTION	ERECTILE DYSFUNCTION	155	625	0.198718	99	440	0.183673	1.317	0.0655903	1.14857	0.0076402	49	289	0.14497	40	175	0.186047	1.33988	0.231477	44	123	0.263473	1.66142	0.0436358	18	25	0.418605	2.12838	0.0505878	1.28584	0.336007	1.90796	0.0976731	1.26052	0.552704	-0.0107427	0.323043	625	73	62	20	0	0	0	440	47	31	21	0
C19 SYMPTOM VOMIT	VOMITING	41	1641	0.0243757	28	1223	0.0223821	0.980629	0.938281	1.28412	0.00860603	13	666	0.0191458	8	446	0.0176211	0.96616	0.940285	16	425	0.0362812	2.23853	0.0391063	2	77	0.0253165	2.30276	0.346637	2.57616	0.0299923	4.25888	0.135015	1.00137	0.998611	0.0040751	0.0449726	1641	36	5	0	0	0	0	1223	25	1	2	0
C19 SYMPTOM LIGHTER SINCE C19	LIGHTER SINCE BEFORE PANDEMIC	387	1181	0.246811	261	912	0.222506	1.0902	0.350242	1.09292	0.0097614	133	500	0.210111	126	299	0.296471	1.60973	0.00106835	97	312	0.237164	1.25232	0.151308	24	49	0.328767	2.3762	0.00369058	0.769504	0.102533	1.33256	0.332288	1.89812	0.032972	0.0234945	0.103673	1181	137	97	60	56	37	0	912	103	63	28	37
C19 SLEEP FREQ WAKEUPS	FREQUENT WAKEUPS	1136	518	0.68682	809	412	0.662572	1.25124	0.0068325	1.08493	0.0120381	432	235	0.647676	311	138	0.69265	1.21133	0.148935	316	116	0.731481	1.25821	0.100899	64	16	0.8	1.39111	0.274231	1.03837	0.807196	1.20254	0.562491	1.28168	0.426708	-0.00175564	0.873497	518	599	336	201	0	0	0	412	424	219	166	0
C19 SYMPTOM MENSTRUAL PROBLEM	MENSTRUAL PROBLEMS	152	435	0.258944	84	367	0.186253	1.36983	0.0433768	1.15156	0.0131529	47	191	0.197479	50	113	0.306748	1.80927	0.0120154	52	116	0.309524	2.0576	0.00263065	2	9	0.181818	1.13133	0.881442	1.07	0.780437	0.54575	0.430213	0.529649	0.410717	-0.0208986	0.248148	435	65	50	37	0	0	0	367	46	25	13	0
C19 SYMPTOM BRUISES	BRUISES	280	1395	0.167164	173	1071	0.139068	1.25865	0.0343584	1.09858	0.0177784	105	575	0.154412	66	387	0.145695	0.904693	0.566004	91	345	0.208716	1.41304	0.0409858	13	65	0.166667	1.83371	0.0994968	1.52068	0.023601	1.60127	0.210262	1.25867	0.527003	0.00937787	0.0984682	1395	214	58	8	0	0	0	1071	134	28	11	0
C19 SYMPTOM WORSENED HEARING	WORSENED HEARING	264	1247	0.174719	72	1076	0.0627178	3.72265	1.31249e-23	1.09155	0.0246368	83	532	0.134959	77	335	0.186893	1.43759	0.0406714	79	311	0.202564	1.28756	0.161165	22	46	0.323529	1.70556	0.0977074	0.939113	0.734008	1.24226	0.5018	1.42253	0.278939	0.000993832	0.891778	1247	154	89	21	0	0	0	1076	45	21	6	0
C19 SYMPTOM SKIN RASH	SKIN RASH	315	1359	0.188172	163	1085	0.130609	1.52308	5.43267e-05	1.05491	0.142934	110	566	0.162722	101	351	0.223451	1.47726	0.01151	81	357	0.184932	1.15744	0.37717	16	63	0.202532	1.38548	0.314953	0.827097	0.263389	1.06526	0.845434	1.31789	0.399516	0.00268464	0.743084	1359	181	72	62	0	0	0	1085	106	33	24	0
C19 SYMPTOM PAIN DURING URINATION	PAINFUL URINATION	57	1623	0.0339286	33	1216	0.0264211	1.3513	0.17329	1.09867	0.213258	21	658	0.0309278	12	441	0.0264901	0.858784	0.676782	20	419	0.0455581	1.55271	0.179285	4	76	0.05	1.49412	0.51837	1.78264	0.119684	2.46739	0.190245	0.992	0.989207	0.000902256	0.756313	1623	45	8	4	0	0	0	1216	29	2	2	0
C19 SYMPTOM FAINTED	FAINTING	6	1666	0.00358852	7	1239	0.00561798	0.603167	0.370305	1.22782	0.389847	3	675	0.00442478	0	449	0	3.88443e-08	0.0834839	3	435	0.00684932	1.66755	0.545775	0	78	0	6.47319e-07	0.585583	9.81954e+07	0.042258	1	1	6.18804e-08	0.482726	-0.00132534	0.111474	1666	5	1	0	0	0	0	1239	7	0	0	0
C19 SYMPTOM NIPPLE DISCHARGE	NIPPLE DISCHARGE	7	1664	0.00418911	4	1244	0.00320513	0.902242	0.874661	1.00186	0.993809	3	674	0.00443131	2	446	0.00446429	1.06955	0.942282	2	437	0.00455581	1.43127	0.708979	0	78	0	9.6528e-08	0.68254	1.35044	0.770071	8.75079e-08	0.670015	1.28654e-07	0.600166	-0.00130766	0.136511	1664	6	1	0	0	0	0	1244	3	1	0	0
[truncated: 6 more columns]

## Sheet: S3b C19Q Symptoms adj
Table S3b. Symptoms from the C19Q questionnaire adjusted for comorbidities. The table shows the association of SARS-CoV-2 status, the severity scale and severity categories with recent symptoms, using logistic regression adjusting for age, sex, BMI, hypertension, asthma, type 2 diabetes, cancer and coronary artery disease. For logistic regression analysis, the recent symptoms are coded as 1 or 0 …
		SARS-CoV-2 cases (1) vs C19Q controls (0)								SARS-CoV-2 Severity Scale		SARS-CoV-2 severity category 1 vs 2								SARS-CoV-2 severity category 1 vs 3					SARS-CoV-2 severity category 1 vs 4					SARS-CoV-2 severity category 2 vs 3		SARS-CoV-2 severity category 2 vs 4		SARS-CoV-2 severity category 3 vs 4		Time since SARS-CoV-2 diagnosis		N for each answer among Covid cases							N for each answer among C19Q controls
Variable	Symptom name	N SARS-CoV-2 cases with symptom	N SARS-CoV-2 cases without symptom	Fraction of SARS-CoV-2 cases with symptom (%)	N controls with symptom	N controls without symptom	Fraction of controls with symptom (%)	OR	P-value	OR	P-value	N in severity category 1 with symptom	N in severity category 1 without symptom	Fraction of severity category 1 with symptom (%)	N in severity category 2 with symptom	N in severity category 2 without symptom	Fraction of severity category 2 with symptom (%)	OR	P-value	N in severity category 3 with symptom	N in severity category 3 without symptom	Fraction of severity category 3 with symptom (%)	OR	P-value	N in severity category 4 with symptom	N in severity category 4 without symptom	Fraction of severity category 4 with symptom (%)	OR	P-value	OR	P-value	OR	P-value	OR	P-value	Effect	P-value	1	2	3	4	5	6	7	1	2	3	4	5
C19 SYMPTOM IMPAIRED SMELL	IMPAIRED OR DISTURBED SMELL	493	1068	0.315823	50	1160	0.0413223	11.7289	1.95698e-87	1.12963	0.000218368	156	471	0.248804	147	276	0.347518	1.54914	0.00188139	161	249	0.392683	1.73439	0.000142652	20	55	0.266667	1.13839	0.682799	1.10677	0.501018	0.791841	0.455269	0.606983	0.0991867	-0.046995	7.8617e-05	1068	213	102	178	0	0	0	1160	30	10	10	0
C19 SYMPTOM IMPAIRED TASTE	IMPAIRED OR DISTURBED TASTE	359	1205	0.22954	41	1170	0.0338563	9.38114	2.34817e-58	1.14993	0.000120729	108	522	0.171429	106	318	0.25	1.54947	0.00571036	119	290	0.290954	1.67974	0.00125023	18	57	0.24	1.61158	0.165602	1.11164	0.518788	1.13887	0.697033	0.775322	0.423245	-0.0315678	0.00225266	1205	167	73	119	0	0	0	1170	28	6	7	0
C19 SYMPTOM MEMORY IMPAIRMENT	MEMORY DISTURBANCE	720	842	0.460948	275	936	0.227085	3.45803	1.09086e-46	1.28017	9.86002e-15	217	411	0.345541	195	227	0.462085	1.55778	0.000979965	240	170	0.585366	2.31985	1.53003e-09	54	21	0.72	4.35394	6.53015e-07	1.48465	0.00711954	2.63531	0.00121896	2.05175	0.015346	-0.0214184	0.0452944	842	391	216	113	0	0	0	936	193	57	25	0
C19 SYMPTOM DYSPNEA	DYSPNEA	717	858	0.455238	271	947	0.222496	3.39899	5.72568e-45	1.32608	5.69632e-19	205	425	0.325397	205	223	0.478972	1.7987	9.0363e-06	241	172	0.583535	2.45936	7.76815e-11	55	22	0.714286	4.13407	1.04816e-06	1.40538	0.0183583	2.75536	0.000569646	1.85529	0.0343773	-0.015342	0.14544	858	412	188	117	0	0	0	947	194	57	20	0
C19 EXERCISE MALAISE AFTER PHYSICAL STRESS	MALAISE AFTER PHYSICAL STRESS	556	995	0.358478	190	988	0.16129	3.24528	1.60445e-35	1.36288	4.33053e-21	136	486	0.21865	164	261	0.385882	2.11393	1.40951e-07	206	197	0.511166	3.2017	8.17696e-16	42	34	0.552632	3.2233	5.64355e-05	1.57234	0.00215099	2.03528	0.0148501	1.29043	0.36928	0.0289845	0.00103344	995	397	102	57	0	0	0	988	141	31	18	0
C19 SYMPTOM LACK OF CONCENTRATION	LACK OF CONCENTRATION	913	656	0.581899	444	770	0.365733	2.46441	1.29486e-29	1.2436	8.47757e-12	303	327	0.480952	271	156	0.63466	1.83147	3.55496e-06	274	136	0.668293	2.11101	6.80188e-08	52	23	0.693333	3.39839	3.71046e-05	1.18793	0.253776	2.01847	0.0216072	1.64551	0.100381	-0.0222821	0.0446139	656	500	277	136	0	0	0	770	274	119	51	0
C19 SYMPTOM WORSENED SIGHT	WORSENED SIGHT	521	947	0.354905	236	952	0.198653	2.51861	5.33356e-24	1.20618	1.52986e-08	164	433	0.274707	142	259	0.354115	1.40501	0.0183706	169	212	0.44357	1.845	2.64662e-05	39	28	0.58209	2.61011	0.00135346	1.30072	0.0867574	1.9145	0.0339892	2.05713	0.0162269	0.000895995	0.930313	947	241	230	50	0	0	0	952	150	70	16	0
C19 SYMPTOM WORSENED HEARING	WORSENED HEARING	250	1163	0.176929	70	1048	0.0626118	3.77903	3.70886e-23	1.0945	0.029827	79	492	0.138354	72	316	0.185567	1.34299	0.111305	74	290	0.203297	1.28193	0.192377	22	44	0.333333	1.73317	0.118506	0.994054	0.975422	1.33478	0.405455	1.54301	0.202895	-0.000404194	0.957156	1163	149	82	19	0	0	0	1048	45	21	4	0
C19 SYMPTOM CHEST PAIN	CHEST PAIN	439	1132	0.27944	176	1040	0.144737	2.41782	2.47265e-19	1.25508	2.03864e-11	112	517	0.17806	126	298	0.29717	1.85082	5.39749e-05	161	254	0.387952	2.60604	2.55877e-10	32	44	0.421053	3.26491	0.000101188	1.41549	0.0217378	1.76473	0.0535587	1.33234	0.307958	-0.00525082	0.534741	1132	293	105	41	0	0	0	1040	146	22	8	0
C19 GEN HEALTH SLEEP QUALITY	CHANGE IN SLEEP QUALITY TO THE WORSE	398	1150	0.257106	144	1043	0.121314	2.48573	1.88216e-18	1.26798	8.75911e-12	109	509	0.176375	118	307	0.277647	1.79383	0.000124594	136	269	0.335802	2.21313	4.0594e-07	29	46	0.386667	2.9656	0.00049362	1.32274	0.0724726	2.0022	0.0209963	1.47005	0.184079	-0.00143159	0.847726	8	66	1076	324	74	0	0	18	75	950	127	17
C19 SYMPTOM FATIGUE	FATIGUE	1132	442	0.719187	685	527	0.565182	2.06825	3.87342e-18	1.39759	1.44237e-19	378	255	0.597156	330	97	0.772834	2.2025	2.60933e-08	342	71	0.828087	2.96607	2.98154e-12	65	9	0.878378	5.21285	2.91771e-06	1.37396	0.0798642	2.41577	0.0238796	2.00243	0.0786108	-0.0380935	0.00124248	442	535	322	275	0	0	0	527	432	161	92	0
C19 SYMPTOM WEAKNESS	WEAKNESS	704	874	0.446134	367	848	0.302058	2.02182	9.02962e-18	1.33166	6.92167e-20	190	441	0.301109	213	216	0.496503	2.19467	2.30541e-09	238	177	0.573494	2.64801	8.86013e-13	53	23	0.697368	4.47925	1.90211e-07	1.23676	0.138046	2.17237	0.00874677	1.92183	0.0235368	-0.0238734	0.0219077	874	435	159	110	0	0	0	848	266	69	32	0
C19 SYMPTOM TACHYCARDIA	TACHYCARDIA	478	1087	0.305431	220	999	0.180476	2.23543	1.1696e-17	1.18016	8.02309e-07	150	481	0.237718	134	291	0.315294	1.41348	0.0171961	152	256	0.372549	1.62308	0.00109387	33	41	0.445946	2.43924	0.00284167	1.1937	0.250021	2.02462	0.0198641	1.89908	0.0259458	-0.0110525	0.143811	1087	367	90	21	0	0	0	999	191	25	4	0
C19 EXERCISE EXERCISES	DISCOMFORT EXERCISING	822	632	0.565337	459	638	0.418414	1.87004	1.16746e-13	1.24234	9.54825e-11	261	315	0.453125	236	158	0.598985	1.74609	5.39393e-05	262	127	0.673522	2.22984	4.13772e-08	49	20	0.710145	2.5568	0.00269235	1.3362	0.0655515	1.63922	0.116906	1.34247	0.350878	-0.0179817	0.318571	632	43	246	243	117	0	0	638	34	147	86	43
C19 SYMPTOM PALPITATIONS	PALPITATIONS	400	1152	0.257732	203	1007	0.167769	1.95759	9.57496e-12	1.18338	1.89036e-06	118	513	0.187005	108	312	0.257143	1.41905	0.0251867	137	264	0.341646	1.74398	0.000379326	27	46	0.369863	1.80617	0.0582551	1.31317	0.0918638	1.83056	0.0569722	1.37301	0.28939	-0.00351534	0.636715	1152	301	74	25	0	0	0	1007	173	21	9	0
C19 SYMPTOM HOARSENESS	HOARSENESS	290	1268	0.186136	131	1072	0.108894	2.1595	1.1583e-11	1.10446	0.00969012	90	534	0.144231	77	348	0.181176	1.2589	0.186808	95	314	0.232274	1.41645	0.0459427	24	53	0.311688	1.52318	0.189235	1.15179	0.431801	1.2485	0.492786	1.26384	0.463159	-0.0145146	0.0335316	1268	204	66	20	0	0	0	1072	99	22	10	0
C19 SYMPTOM IMBALANCE	LOSS OF BALANCE OR COORDINATION	338	1225	0.216251	164	1049	0.135202	1.99034	5.70316e-11	1.34157	2.50219e-15	82	547	0.130366	77	343	0.183333	1.38452	0.068064	137	276	0.331719	2.64544	3.03108e-09	35	40	0.466667	4.4638	1.25807e-06	2.0084	3.60318e-05	3.93364	1.22094e-05	1.77467	0.0420941	0.00122896	0.86685	1225	232	80	26	0	0	0	1049	124	33	7	0
C19 SYMPTOM PAROXYSMAL NOCTURNAL DYSPNEA	PAROXYSMAL NOCTURNAL DYSPNEA	119	1458	0.0754597	29	1190	0.02379	3.56922	5.91348e-11	1.35101	9.92773e-08	24	610	0.0378549	24	402	0.056338	1.42082	0.246806	59	355	0.142512	3.56933	4.43234e-07	11	65	0.144737	2.9232	0.0294874	2.55499	0.00019199	3.30069	0.0139088	0.870433	0.717736	-0.00638846	0.141248	1458	87	28	4	0	0	0	1190	22	5	2	0
C19 SYMPTOM TEMPERATURE	TEMPERATURE	143	1428	0.0910248	47	1201	0.0376603	2.88051	1.4257e-10	1.24779	1.23967e-05	33	600	0.0521327	35	390	0.0823529	1.59914	0.0676378	55	356	0.13382	2.25814	0.000614847	18	58	0.236842	2.37484	0.0294616	1.43798	0.12266	2.40738	0.0261467	1.34506	0.399811	-0.00536273	0.413938	1428	68	40	35	0	0	0	1201	39	8	0	0
C19 GEN HEALTH DIFF WALKING 1FLOOR	DIFFICULTY WALKING 1 FLOOR	206	1373	0.130462	83	1126	0.0686518	2.36314	4.107e-10	1.3597	3.24846e-11	48	584	0.0759494	41	389	0.0953488	1.09713	0.695342	82	332	0.198068	2.29889	6.65729e-05	30	46	0.394737	7.2772	3.19079e-08	2.15417	0.000366348	9.79749	1.18576e-09	2.89071	0.000855437	-0.00536046	0.233793	1373	179	26	1	0	0	0	1126	75	7	1	0
C19 SYMPTOM VISUAL DISTURBANCES	VISUAL DISTURBANCES	300	1262	0.192061	142	1075	0.11668	1.93315	1.81148e-09	1.24085	2.01787e-08	82	542	0.13141	78	348	0.183099	1.42623	0.0428819	108	303	0.262774	2.16181	6.47542e-06	24	50	0.324324	3.26907	0.000345988	1.53293	0.0135917	2.48622	0.00595757	1.74296	0.0674925	-0.00333175	0.645938	1262	206	67	27	0	0	0	1075	99	34	9	0
C19 SYMPTOM TINNITUS	TINNITUS	566	998	0.361893	328	893	0.268632	1.63818	4.49296e-09	1.11694	0.000409627	179	452	0.283677	177	246	0.41844	1.80198	1.16259e-05	166	240	0.408867	1.55159	0.00183819	32	45	0.415584	1.63913	0.0818168	0.902162	0.480799	0.897987	0.703606	0.934146	0.803653	0.0169454	0.140654	998	297	111	158	0	0	0	893	156	47	125	0
C19 SYMPTOM SHORTNESS OF BREATH	SHORTNESS OF BREATH MRC	1147	382	0.750164	760	408	0.650685	1.67656	5.60225e-09	1.14902	0.000191716	423	189	0.691176	327	93	0.778571	1.50978	0.00595839	314	82	0.792929	1.3943	0.0391916	64	11	0.853333	2.24502	0.0236261	0.937096	0.715736	1.82778	0.109575	1.61793	0.193806	0.00570207	0.627196	382	554	455	80	35	23	0	408	408	307	26	13
C19 SYMPTOM DIZZINESS	DIZZINESS	502	1069	0.319542	279	941	0.228689	1.66677	9.60292e-09	1.27361	2.5626e-13	143	488	0.226624	139	287	0.326291	1.60072	0.00114877	171	241	0.415049	2.21053	6.61441e-08	43	33	0.565789	4.66122	1.50153e-07	1.40912	0.0221559	3.29164	4.53901e-05	1.98176	0.0134644	-0.010886	0.187189	1069	356	113	33	0	0	0	941	221	47	11	0
C19 SYMPTOM EXCESSIVE SWEATING	EXCESSIVE SWEATING	343	1226	0.218611	178	1037	0.146502	1.77029	2.86951e-08	1.12196	0.00167345	105	526	0.166403	103	323	0.241784	1.50794	0.01021	109	299	0.267157	1.46941	0.0192626	22	55	0.285714	1.63087	0.135435	1.00673	0.967763	1.26343	0.468528	1.22349	0.514416	0.00718618	0.401939	1226	212	70	61	0	0	0	1037	122	38	18	0
C19 SYMPTOM JOINT PAIN	JOINT PAIN	763	803	0.487229	516	705	0.422604	1.56468	4.53813e-08	1.22516	3.06092e-10	227	401	0.361465	222	204	0.521127	1.86382	2.94497e-06	243	167	0.592683	2.03618	3.62985e-07	56	19	0.746667	3.26381	8.43079e-05	1.09643	0.536217	1.96628	0.0291829	1.81918	0.0524478	-0.0122741	0.296176	803	348	218	197	0	0	0	705	260	131	125	0
C19 SYMPTOM NUMBNESS IN THE HANDS OR FEET	NUMBNESS IN HANDS OR FEET	473	1096	0.301466	276	938	0.227348	1.62758	5.90517e-08	1.19059	1.2008e-07	131	499	0.207937	146	279	0.343529	1.884	1.26319e-05	157	255	0.381068	1.95721	6.22231e-06	33	42	0.44	2.14575	0.00982805	1.06379	0.677695	1.19173	0.544627	1.20304	0.505884	-0.0076879	0.409298	1096	289	116	68	0	0	0	938	169	60	47	0
C19 SYMPTOM DIFFICULTY SWALLOWING	DIFFICULTY SWALLOWING	176	1384	0.112821	74	1136	0.061157	2.11898	1.13832e-07	1.16074	0.00136356	47	579	0.0750799	49	373	0.116114	1.54397	0.045925	61	351	0.148058	1.71793	0.012166	17	58	0.226667	3.03818	0.00399788	1.15109	0.508879	2.03743	0.0569782	1.36211	0.377732	-0.00663441	0.249064	1384	128	29	19	0	0	0	1136	60	10	4	0
C19 SYMPTOM SHIVER	CHILLS	437	1051	0.293683	193	770	0.200415	1.6892	1.70692e-07	1.19984	1.87245e-07	126	479	0.208264	137	264	0.341646	1.91549	1.46298e-05	143	246	0.367609	2.09642	2.49497e-06	25	47	0.347222	2.35537	0.0098524	1.11644	0.481694	1.25751	0.463278	1.21439	0.523693	-0.0112249	0.166994	1051	317	91	29	0	0	0	770	155	30	8	0
C19 SYMPTOM BURNING EYES	BURNING EYES	375	1186	0.240231	221	1000	0.180999	1.58543	1.75483e-06	1.20412	1.42594e-07	107	523	0.169841	93	328	0.220903	1.32939	0.077906	133	275	0.32598	2.07397	3.21851e-06	32	43	0.426667	2.96984	0.000319762	1.49346	0.0135923	1.82769	0.049036	1.52952	0.136366	-0.0120708	0.105691	1186	280	66	29	0	0	0	1000	164	41	16	0
C19 SYMPTOM ORTHOSTATIC HYPOTENSION	DIZZINESS STANDING UP	562	1008	0.357962	334	881	0.274897	1.45567	9.00102e-06	1.19993	1.48628e-08	189	439	0.300955	155	270	0.364706	1.32104	0.0423027	173	241	0.417874	1.72808	0.000121791	38	38	0.5	2.94457	0.00019647	1.33889	0.0482021	2.24103	0.00528227	1.62183	0.0813484	-0.0140699	0.0914898	1008	421	106	35	0	0	0	881	275	49	10	0
C19 SYMPTOM DRY EYES	DRY EYES	480	1090	0.305732	312	912	0.254902	1.46805	1.41265e-05	1.15308	1.91488e-05	143	487	0.226984	135	290	0.317647	1.50327	0.00489114	161	251	0.390777	1.82327	4.92573e-05	29	47	0.381579	1.82638	0.0446821	1.16374	0.320451	0.992477	0.979922	0.991128	0.975458	-0.0144754	0.119821	1090	296	113	71	0	0	0	912	197	73	42	0
C19 SYMPTOM EAR PAIN	EAR PAIN	240	1296	0.15625	113	1045	0.097582	1.68943	1.52526e-05	1.15057	0.000798464	73	547	0.117742	70	351	0.166271	1.48288	0.0318732	77	323	0.1925	1.75524	0.0026975	16	55	0.225352	2.69415	0.00762502	1.14411	0.47642	1.8302	0.0983216	1.32268	0.421043	-0.00641829	0.311986	1296	180	43	17	0	0	0	1045	85	19	9	0
C19 SYMPTOM MUSCLE PAIN	MUSCLE PAIN	635	937	0.403944	426	794	0.34918	1.42873	1.59901e-05	1.2227	2.10382e-10	179	454	0.28278	195	232	0.456674	2.05275	8.26587e-08	209	201	0.509756	2.21578	1.17268e-08	43	32	0.573333	2.91144	0.000199506	1.08835	0.560391	1.45564	0.191611	1.33146	0.322203	-0.00874691	0.430174	937	322	175	138	0	0	0	794	224	119	83	0
C19 SYMPTOM HAIR LOSS	HAIR LOSS	264	1293	0.169557	147	1060	0.12179	1.63785	2.92695e-05	1.12764	0.00584737	83	542	0.1328	76	347	0.179669	1.38651	0.0805805	88	321	0.215159	1.62939	0.0101245	15	59	0.202703	2.08989	0.0899809	1.10342	0.608128	1.25093	0.581635	1.5028	0.284798	-0.00934626	0.278522	1293	110	82	72	0	0	0	1060	74	36	37	0
C19 SYMPTOM FREQUENT URINATION	FREQUENT URINATION	442	1124	0.282248	277	932	0.229115	1.45477	3.18892e-05	1.10733	0.00233293	139	491	0.220635	129	292	0.306413	1.50836	0.00486851	121	291	0.293689	1.1897	0.258849	40	36	0.526316	2.3552	0.0026814	0.836862	0.256258	1.79921	0.0394308	2.13737	0.00624406	-0.000973812	0.920243	1124	261	95	86	0	0	0	932	147	75	55	0
C19 SYMPTOM SKIN RASH	SKIN RASH	299	1272	0.190325	158	1056	0.130148	1.55928	3.2174e-05	1.0227	0.561159	104	526	0.165079	93	333	0.21831	1.34171	0.0697741	79	333	0.191748	1.0792	0.662217	16	60	0.210526	0.990648	0.978668	0.823475	0.274057	0.803356	0.529692	1.24884	0.512593	-0.000992933	0.907151	1272	172	66	61	0	0	0	1056	101	33	24	0
C19 SYMPTOM SOUND SENSITIVITY	SOUND SENSITIVITY	254	1314	0.16199	138	1074	0.113861	1.60142	4.34246e-05	1.32582	8.25364e-12	59	571	0.0936508	65	359	0.153302	1.64123	0.0117137	103	308	0.250608	2.86807	1.29851e-08	24	52	0.315789	5.22467	3.4321e-06	1.72251	0.00288571	2.85745	0.002223	1.90043	0.0412821	-0.00495862	0.480395	1314	159	67	28	0	0	0	1074	95	36	7	0
C19 SYMPTOM NIGHT SWEATS	NIGHT SWEATS	511	1049	0.327564	324	896	0.265574	1.41614	5.16125e-05	1.16351	3.38319e-06	158	467	0.2528	150	276	0.352113	1.5841	0.00102263	168	241	0.410758	1.84106	2.55184e-05	29	45	0.391892	2.03594	0.0171483	1.17592	0.275039	1.31251	0.355235	1.12038	0.693175	0.0119737	0.176363	1049	347	116	48	0	0	0	896	248	53	23	0
C19 SYMPTOM LOSS OF APPETITE	LOSS OF APPETITE	264	1307	0.168046	130	1089	0.106645	1.60612	5.8129e-05	1.22408	2.13129e-06	77	556	0.121643	83	342	0.195294	1.77811	0.00149391	80	330	0.195122	2.18275	6.1812e-05	18	58	0.236842	5.43179	1.55083e-05	1.09233	0.635802	1.93008	0.0642001	2.37465	0.0145992	-0.00291363	0.667137	1307	179	60	25	0	0	0	1089	102	21	7	0
C19 SYMPTOM HEAVIER SINCE C19	HEAVIER SINCE BEFORE PANDEMIC	808	689	0.539746	539	635	0.459114	1.37165	9.98383e-05	1.13388	9.46955e-05	288	312	0.48	225	185	0.54878	1.29157	0.0527654	242	151	0.615776	1.68298	0.000246629	41	27	0.602941	1.4879	0.178231	1.22466	0.179993	1.10925	0.732254	1.03701	0.905267	0.0256732	0.137507	689	213	240	162	155	38	0	635	195	154	86	78
C19 SYMPTOM ITCHING	ITCHING	400	1170	0.254777	244	972	0.200658	1.41551	0.000183149	1.08902	0.0131675	119	512	0.18859	130	294	0.306604	1.813	6.07273e-05	119	293	0.288835	1.46919	0.0142561	21	55	0.276316	1.10403	0.755207	0.826062	0.222089	0.700943	0.252305	0.864732	0.630431	-0.0125086	0.150702	1170	248	102	50	0	0	0	972	167	54	23	0
C19 SYMPTOM DRY MOUTH	DRY MOUTH	443	1123	0.282886	290	933	0.237122	1.39094	0.000232026	1.14496	5.27448e-05	136	494	0.215873	128	296	0.301887	1.49234	0.00608421	132	279	0.321168	1.51762	0.00570111	36	39	0.48	2.29389	0.00418308	0.999388	0.996844	1.51266	0.161575	1.9351	0.0188811	0.0133972	0.135668	1123	267	124	52	0	0	0	933	199	64	27	0
C19 SYMPTOM PHOTOSENSITIVITY	LIGHT SENSITIVITY	304	1267	0.193507	174	1041	0.14321	1.46371	0.000309153	1.28282	1.24024e-10	81	551	0.128165	87	337	0.205189	1.68677	0.0024876	102	309	0.248175	2.11677	1.85108e-05	29	48	0.376623	5.11788	6.36771e-07	1.3064	0.124786	3.55794	8.84271e-05	2.89045	0.000536703	0.000529177	0.943593	1267	196	77	31	0	0	0	1041	135	31	8	0
C19 SYMPTOM SWOLLEN OR STIFF JOINTS	SWOLLEN OR STIFF JOINTS	628	939	0.400766	450	768	0.369458	1.33598	0.000467487	1.13553	6.71954e-05	191	440	0.302694	191	233	0.450472	1.80694	1.52009e-05	199	210	0.486553	1.68901	0.00022283	36	40	0.473684	1.17508	0.574225	0.963067	0.798341	0.773008	0.372597	0.820212	0.479181	-0.00613028	0.577805	939	321	168	139	0	0	0	768	249	111	90	0
C19 SYMPTOM HEARTBURN	HEARTBURN	413	1156	0.263225	266	954	0.218033	1.36412	0.000676166	1.12871	0.000371229	135	497	0.213608	104	321	0.244706	1.15127	0.35296	136	273	0.332518	1.62238	0.00127593	29	47	0.381579	2.01769	0.0174222	1.38029	0.0424719	1.57394	0.130632	1.20569	0.512174	0.0115034	0.123162	1156	314	75	24	0	0	0	954	209	37	20	0
C19 SYMPTOM HEAT INTOLERANCE	HEAT INTOLERANCE	165	1386	0.106383	94	1113	0.077879	1.59128	0.000753616	1.18744	0.000471847	42	584	0.0670927	49	369	0.117225	1.7411	0.0138067	64	344	0.156863	1.99785	0.00163634	8	65	0.109589	1.03501	0.942563	1.23526	0.324162	1.14359	0.775402	0.769003	0.540631	-0.00928906	0.124394	1386	99	47	19	0	0	0	1113	67	17	10	0
C19 GEN HEALTH DIFF WALKING 400M	DIFFICULTY WALKING 400M	154	1418	0.0979644	85	1117	0.0707155	1.62461	0.000782879	1.19655	0.000416599	44	586	0.0698413	29	399	0.067757	0.762869	0.29983	60	351	0.145985	1.71066	0.0160799	19	57	0.25	2.70679	0.0113466	2.07191	0.00272099	4.20368	0.000676505	2.42251	0.0112691	-0.00321189	0.464459	1418	129	20	5	0	0	0	1117	59	20	6	0
C19 SYMPTOM DISCOMFORT STANDING	DISCOMFORT STANDING	368	1203	0.234246	238	970	0.19702	1.3714	0.00113727	1.28719	3.64222e-12	89	541	0.14127	109	316	0.256471	1.96492	4.06284e-05	127	286	0.307506	2.12307	5.44027e-06	36	40	0.473684	4.06154	9.74649e-06	1.16978	0.331634	2.77056	0.000809416	2.01543	0.0139573	-0.00238202	0.789421	1203	199	103	66	0	0	0	970	158	47	33	0
C19 SYMPTOM MOOD SWINGS	MOOD SWINGS	484	1081	0.309265	296	913	0.24483	1.3181	0.00188306	1.22649	1.17393e-09	145	483	0.230892	150	274	0.353774	1.82393	2.69075e-05	145	266	0.352798	1.89695	2.21497e-05	32	44	0.421053	3.3434	7.19754e-05	1.07057	0.652682	1.81123	0.0437142	1.71122	0.0622851	-0.0116122	0.119012	1081	378	89	17	0	0	0	913	244	47	5	0
C19 SYMPTOM ABDOMINAL PAIN	ABDOMINAL PAIN	349	1219	0.222577	212	1005	0.174199	1.34575	0.00299318	1.29509	5.33225e-12	97	533	0.153968	96	327	0.22695	1.60614	0.00416599	121	291	0.293689	2.35224	3.0526e-07	28	48	0.368421	5.06878	1.14467e-06	1.49555	0.0156136	2.97437	0.000645075	2.43215	0.0038775	-0.00454254	0.517857	1219	253	79	17	0	0	0	1005	165	35	12	0
C19 SLEEP FREQ WAKEUPS	FREQUENT WAKEUPS	1063	485	0.686693	786	404	0.660504	1.28057	0.00363945	1.07875	0.0276603	398	222	0.641935	296	126	0.701422	1.28625	0.0695185	294	111	0.725926	1.21424	0.189931	62	15	0.805195	1.3238	0.394423	0.960262	0.800832	1.19673	0.597125	1.23377	0.523016	-0.00787426	0.489573	485	557	319	187	0	0	0	404	415	212	159	0
C19 SYMPTOM CALF CRAMPS	CALF CRAMPS	266	1306	0.169211	172	1040	0.141914	1.35156	0.00517516	1.13782	0.0010068	84	549	0.132701	67	358	0.157647	1.17875	0.362847	88	325	0.213075	1.40953	0.0535237	25	50	0.333333	1.927	0.0402781	1.30698	0.148777	2.40774	0.00695588	1.69882	0.0861327	0.000215997	0.972763	1306	198	54	14	0	0	0	1040	135	34	3	0
C19 SLEEP LONG WAKEUPS	LONG WAKEUPS	815	671	0.548452	600	528	0.531915	1.23206	0.0117039	1.10656	0.00208024	295	298	0.49747	212	200	0.514563	1.01857	0.890543	246	140	0.637306	1.37581	0.0269482	48	23	0.676056	1.23632	0.481281	1.42906	0.0187806	1.35645	0.308448	0.884894	0.686886	-0.0194115	0.101741	671	433	220	162	0	0	0	528	323	150	127	0
C19 SLEEP EARLY WAKEUP	EARLY WAKEUP	847	709	0.544344	622	560	0.526227	1.22494	0.0118096	1.11422	0.000767808	296	330	0.472843	234	189	0.553191	1.36908	0.0178707	255	153	0.625	1.51886	0.00295736	47	26	0.643836	0.981412	0.94998	1.20276	0.215948	0.847341	0.582105	0.735782	0.298463	-0.0218522	0.0314906	709	526	228	93	0	0	0	560	399	157	66	0
C19 SYMPTOM BRUISES	BRUISES	259	1311	0.164968	163	1048	0.1346	1.32597	0.012426	1.08245	0.0631972	96	537	0.151659	59	367	0.138498	0.833433	0.32474	86	324	0.209756	1.34622	0.101255	13	62	0.173333	1.77327	0.147049	1.53729	0.0285224	1.66713	0.204719	1.44965	0.335546	0.00997378	0.0875369	1311	197	55	7	0	0	0	1048	126	26	11	0
C19 SYMPTOM HEADACHE	HEADACHE	743	834	0.471148	506	708	0.416804	1.22386	0.0124545	1.20677	3.0168e-09	242	390	0.382911	225	205	0.523256	1.81148	6.771e-06	227	185	0.550971	1.94791	1.35767e-06	37	39	0.486842	2.38149	0.00302576	1.1241	0.425564	1.48238	0.187369	1.0727	0.805266	-0.015074	0.108925	834	523	141	79	0	0	0	708	368	105	33	0
C19 SYMPTOM FLANK PAIN	FLANK PAIN	238	1327	0.152077	158	1054	0.130363	1.31782	0.0148045	1.18377	5.06331e-05	55	578	0.0868878	71	353	0.167453	2.0091	0.000368071	83	324	0.203931	2.30132	2.01037e-05	23	53	0.302632	3.01097	0.0021673	1.15313	0.44475	1.39412	0.3264	1.79762	0.0691761	-0.00246861	0.696005	1327	172	47	19	0	0	0	1054	118	29	11	0
C19 SLEEP DIFFICULT FALLING ASLEEP	DIFFICULT FALLING ASLEEP	919	663	0.58091	644	568	0.531353	1.20066	0.0195262	1.10696	0.000930288	333	302	0.524409	271	159	0.630233	1.56377	0.000512266	253	162	0.609639	1.41735	0.00947222	45	31	0.592105	1.51705	0.129995	0.9501	0.727258	1.05418	0.854461	1.11605	0.692386	-0.000108968	0.992564	663	493	257	169	0	0	0	568	387	151	106	0
C19 SYMPTOM NAUSEA	NAUSEA	255	1316	0.162317	151	1066	0.124076	1.29268	0.0275859	1.24845	5.20517e-07	76	555	0.120444	76	350	0.178404	1.57845	0.0151636	80	332	0.194175	1.95933	0.000580739	17	58	0.226667	4.04608	0.000474866	1.19397	0.361664	2.57574	0.0142815	2.8373	0.00526571	-0.00358302	0.552048	1316	186	57	12	0	0	0	1066	127	17	7	0
C19 SLEEP TIRED AWAKE	TIRED AWAKE	1127	434	0.721973	805	393	0.671953	1.20708	0.0295335	1.34113	4.65591e-16	394	233	0.628389	323	102	0.76	1.84455	1.61933e-05	332	75	0.815725	2.83872	2.35327e-11	61	15	0.802632	4.27817	8.4422e-06	1.55438	0.0130673	2.25966	0.0212207	1.58818	0.194844	-0.0232834	0.017395	434	710	307	110	0	0	0	393	541	189	75	0
C19 SYMPTOM HAND TREMOR	HAND TREMOR	211	1360	0.134309	130	1079	0.107527	1.29551	0.0317613	1.29577	7.60015e-09	45	583	0.0716561	63	364	0.147541	2.27164	8.05233e-05	77	335	0.186893	2.53528	8.82719e-06	19	58	0.246753	3.58315	0.00102742	1.28762	0.196841	2.78687	0.0054414	1.36997	0.350124	0.00625281	0.361751	1360	127	54	30	0	0	0	1079	72	34	24	0
C19 SYMPTOM DIARRHEA	DIARRHEA	356	1220	0.225888	234	984	0.192118	1.22614	0.0334371	1.1566	5.00496e-05	112	521	0.176935	101	326	0.236534	1.38153	0.04017	108	304	0.262136	1.63276	0.00245724	29	48	0.376623	2.53186	0.00313498	1.15602	0.37702	1.69515	0.0900004	1.88134	0.0306428	0.00247386	0.70722	1220	285	60	11	0	0	0	984	195	25	14	0
C19 SYMPTOM SINUS PRESSURE	SINUS PRESSURE	290	1275	0.185304	196	1011	0.162386	1.24567	0.0347699	1.228	1.08773e-07	70	556	0.111821	88	335	0.208038	2.03274	5.40447e-05	104	308	0.252427	2.33729	1.84216e-06	23	54	0.298701	3.05993	0.00106384	1.13593	0.459758	1.50022	0.208474	1.24697	0.479985	-0.00529373	0.444055	1275	207	60	23	0	0	0	1011	147	33	16	0
C19 SYMPTOM COUGH	COUGH	495	1082	0.313887	352	871	0.287817	1.19508	0.0354463	1.14647	2.21169e-05	152	482	0.239748	142	285	0.332553	1.54127	0.00203423	158	254	0.383495	1.76769	7.5271e-05	33	44	0.428571	1.97642	0.0177487	1.13479	0.395486	1.16984	0.584457	1.01075	0.969067	0.0038835	0.641251	1082	360	97	38	0	0	0	871	269	50	33	0
C19 SYMPTOM MENSTRUAL PROBLEM	MENSTRUAL PROBLEMS	141	398	0.261596	81	356	0.185355	1.39978	0.0386999	1.10755	0.0941229	46	172	0.211009	45	106	0.298013	1.4964	0.109316	47	105	0.309211	1.81454	0.0202283	2	9	0.181818	0.652524	0.631226	1.10564	0.699651	0.365789	0.218784	0.606224	0.537199	-0.0242193	0.203807	398	60	45	36	0	0	0	356	44	25	12	0
C19 SYMPTOM PHLEGM	PHLEGM	78	1490	0.0497449	46	1170	0.0378289	1.4658	0.0452231	1.21166	0.00605205	17	614	0.0269414	23	402	0.0541176	1.8203	0.0712773	27	383	0.0658537	2.19505	0.0170658	8	68	0.105263	4.03027	0.0160462	1.11656	0.718016	2.49355	0.106056	1.65275	0.312283	-0.000896841	0.829524	1490	50	19	9	0	0	0	1170	26	14	6	0
C19 SLEEP UNRESTED AFTER SLEEP	UNRESTED AFTER SLEEP	1269	289	0.814506	928	268	0.77592	1.20142	0.0589756	1.17868	4.1346e-05	489	138	0.779904	352	74	0.826291	1.35099	0.0618877	345	60	0.851852	1.60865	0.006626	64	11	0.853333	1.78316	0.108024	1.28458	0.199985	1.57298	0.23994	1.30042	0.49775	-0.0062643	0.560555	289	664	403	202	0	0	0	268	477	305	146	0
C19 SYMPTOM ERECTILE DYSFUNCTION	ERECTILE DYSFUNCTION	144	593	0.195387	96	429	0.182857	1.2917	0.102931	1.10671	0.069794	46	273	0.144201	36	165	0.179104	1.23426	0.421068	41	120	0.254658	1.45592	0.160953	18	23	0.439024	1.66019	0.254778	1.25307	0.420387	1.98624	0.133901	1.22281	0.65638	-0.0130172	0.231931	593	68	57	19	0	0	0	429	46	30	20	0
C19 SLEEP NIGHTMARES	NIGHTMARES	271	1297	0.172832	167	1034	0.139051	1.18405	0.126319	1.21089	5.56129e-06	83	547	0.131746	85	340	0.2	1.70394	0.0023907	79	331	0.192683	1.90072	0.000681395	14	63	0.181818	2.80159	0.00934501	1.09132	0.638455	1.59323	0.216115	1.77685	0.124426	-0.00781463	0.183866	1297	207	60	4	0	0	0	1034	134	29	4	0
C19 SYMPTOM EDEMA	EDEMA	354	1199	0.227946	279	935	0.229819	1.14518	0.167382	1.188	5.81375e-06	93	534	0.148325	103	321	0.242925	1.77576	0.000876564	123	279	0.30597	1.79603	0.000678123	30	45	0.4	1.94228	0.0421564	1.11793	0.516873	1.87832	0.0514311	1.55345	0.149766	-0.0122777	0.141756	1199	201	97	56	0	0	0	935	198	45	36	0
C19 SYMPTOM LIGHTER SINCE C19	LIGHTER SINCE BEFORE PANDEMIC	362	1108	0.246259	251	891	0.21979	1.12241	0.226184	1.08436	0.026424	124	466	0.210169	116	283	0.290727	1.54583	0.00417361	92	293	0.238961	1.23923	0.197129	23	47	0.328571	2.05966	0.028627	0.805705	0.197497	1.36352	0.328917	1.74253	0.0807705	0.023632	0.11743	1108	124	91	57	53	37	0	891	102	60	27	34
C19 SLEEP USES MEDICATIONS	USES SLEEP MEDICATIONS	252	1301	0.162267	193	1002	0.161506	1.13783	0.230012	1.17578	7.02886e-05	67	557	0.107372	69	350	0.164678	1.54598	0.0209991	86	323	0.210269	1.72037	0.00373041	23	52	0.306667	2.15633	0.0243522	1.17732	0.379815	1.6932	0.114414	1.62774	0.125226	-0.00582216	0.560176	1301	91	39	122	0	0	0	1002	81	19	93	0
C19 SYMPTOM FAINTED	FAINTING	5	1563	0.00318878	7	1205	0.00577558	0.544638	0.30327	1.36422	0.256265	2	629	0.00316957	0	422	0	1.01299e-08	0.175515	3	410	0.00726392	2.23908	0.415908	0	75	0	1.10969e-07	0.7076	2.79802e+08	0.0367123	1	1	4.10201e-08	0.554116	-0.0011791	0.0760778	1563	5	0	0	0	0	0	1205	7	0	0	0
C19 SYMPTOM PAIN DURING URINATION	PAINFUL URINATION	51	1523	0.0324015	33	1183	0.0271382	1.242	0.34151	1.1283	0.144122	17	615	0.0268987	11	415	0.0258216	0.962594	0.923703	19	393	0.0461165	1.71238	0.131173	4	73	0.0519481	2.39393	0.197721	1.97344	0.0835838	3.13007	0.131516	1.06057	0.925108	0.0010258	0.719816	1523	41	7	3	0	0	0	1183	29	2	2	0
C19 SYMPTOM NECK PAIN	NECK PAIN	403	1165	0.257015	316	904	0.259016	1.07943	0.396529	1.20416	9.86577e-08	106	525	0.167987	128	295	0.3026	2.09331	1.39375e-06	136	275	0.3309	2.02553	7.93771e-06	25	51	0.328947	1.92144	0.0386375	1.01541	0.922397	1.00065	0.998313	1.11062	0.725768	0.00416401	0.643648	1165	234	108	61	0	0	0	904	180	79	57	0
C19 SYMPTOM SORE THROAT	SORE THROAT	312	1243	0.200643	261	957	0.214286	0.941843	0.53278	1.17744	1.52843e-05	89	535	0.142628	94	327	0.223278	1.70024	0.00132964	100	307	0.2457	1.7788	0.00075351	24	52	0.315789	2.62504	0.00308088	1.02319	0.894308	1.74892	0.0853799	1.75022	0.0757062	-0.00122521	0.865154	1243	225	61	26	0	0	0	957	215	36	10	0
C19 GEN HEALTH SLEEP QUALITY	WORSE SLEEP QUALITY	465	1101	0.296935	338	866	0.280731	1.04599	0.605807	1.21145	9.54464e-09	148	477	0.2368	129	297	0.302817	1.37301	0.0271343	153	259	0.371359	1.81499	5.63146e-05	28	49	0.363636	1.88242	0.0386489	1.456	0.0137644	1.76136	0.0599084	1.33137	0.326268	-0.00477456	0.541932	165	936	410	55	0	0	0	162	704	293	45	0
C19 SYMPTOM CONSTIPATION	CONSTIPATION	316	1255	0.201146	251	967	0.206076	1.05019	0.617782	1.14442	0.000366815	90	540	0.142857	94	330	0.221698	1.59432	0.00594538	103	311	0.248792	1.68703	0.00210374	20	56	0.263158	1.42211	0.311518	1.10063	0.572496	1.04402	0.899241	0.924355	0.800956	-0.0104168	0.115896	1255	240	60	16	0	0	0	967	205	38	8	0
C19 SYMPTOM URINARY INCONTINENCE	URINARY INCONTINENCE	177	1397	0.112452	162	1049	0.133774	0.956348	0.716498	1.1331	0.009132	47	584	0.0744849	49	377	0.115023	1.54976	0.0553387	61	353	0.147343	1.5806	0.0388016	17	60	0.220779	1.9832	0.090393	1.02825	0.899709	1.04791	0.905244	1.03201	0.931711	-0.00439554	0.44545	1397	123	32	22	0	0	0	1049	104	36	22	0
C19 SYMPTOM VOMIT	VOMITING	39	1538	0.0247305	24	1193	0.0197206	1.09337	0.740422	1.25044	0.027513	12	620	0.0189873	8	419	0.0187354	0.978495	0.963514	15	400	0.0361446	1.91468	0.121993	2	74	0.0263158	1.71375	0.596091	2.41433	0.0530817	10.1866	0.0482867	0.842399	0.834084	0.00398641	0.0617134	1538	34	5	0	0	0	0	1193	21	1	2	0
C19 SYMPTOM NIPPLE DISCHARGE	NIPPLE DISCHARGE	7	1560	0.00446713	4	1210	0.00329489	0.802658	0.744373	0.917424	0.732544	3	627	0.0047619	2	419	0.00475059	0.840823	0.854678	2	412	0.00483092	1.30467	0.786442	0	75	0	1.65941e-07	0.753352	1.39944	0.763832	3.37708e-08	0.6661	4.38783e-09	0.295735	-0.00152329	0.104458	1560	6	1	0	0	0	0	1210	3	1	0	0
C19 GEN HEALTH HEALTH STATUS EST	WORSE STATE OF HEALTH	188	1390	0.119138	137	1066	0.113882	1.04123	0.745377	1.39145	2.12286e-12	43	588	0.0681458	41	391	0.0949074	1.30215	0.261473	81	332	0.196126	3.13623	4.54677e-08	21	54	0.28	5.52118	8.96947e-06	2.25637	0.00011555	3.89113	0.000315762	2.02653	0.0343952	0.0216813	0.0325704	194	656	540	149	39	0	0	169	537	360	110	27
C19 SYMPTOM NASAL CONGESTION	NASAL CONGESTION	555	1007	0.355314	413	793	0.342454	1.0247	0.766853	1.11367	0.0007554	203	424	0.323764	150	277	0.351288	1.13073	0.364015	157	251	0.384804	1.37663	0.0236948	36	39	0.48	2.14443	0.00759212	1.18802	0.247383	2.17526	0.00814993	1.47094	0.166622	-0.0133753	0.166624	1007	361	122	72	0	0	0	793	282	73	58	0
C19 EXERCISE MALAISE AFTER MENTAL STRESS	MALAISE AFTER MENTAL STRESS	619	883	0.412117	467	685	0.405382	0.981478	0.823122	1.23245	1.2629e-10	198	403	0.329451	180	227	0.44226	1.60849	0.000499027	198	199	0.498741	2.02577	6.24685e-07	36	39	0.48	2.47589	0.00195204	1.34912	0.0485027	2.03369	0.0200157	1.38783	0.258077	-0.00113769	0.89604	883	465	114	40	0	0	0	685	383	63	21	0
C19 GEN HEALTH HEALTH WORRIES	HEALTH WORRIES	328	1250	0.207858	251	954	0.208299	0.980612	0.840341	1.2685	1.81043e-10	83	549	0.131329	94	335	0.219114	1.79357	0.000513205	117	296	0.283293	2.47797	7.7522e-08	25	52	0.324675	2.92819	0.00104074	1.37977	0.0534108	1.8155	0.0570794	1.24888	0.458793	-0.0114521	0.500337	291	319	345	295	272	42	14	194	211	295	254	210
C19 SYMPTOM RUNNY NOSE	RUNNY NOSE	695	865	0.445513	533	676	0.44086	1.00185	0.98115	1.09571	0.00293902	245	383	0.390127	202	221	0.477541	1.39286	0.0100697	191	217	0.468137	1.30783	0.0479211	44	31	0.586667	2.20699	0.00499309	0.94503	0.694349	1.40839	0.228901	1.6204	0.0845645	-0.00472185	0.647005	865	447	153	95	0	0	0	676	390	95	48	0
C19 SYMPTOM BACK PAIN	BACK PAIN	790	788	0.500634	614	606	0.503279	1.00133	0.986395	1.14046	1.69016e-05	264	366	0.419048	232	198	0.539535	1.56209	0.000460946	233	182	0.561446	1.65685	0.00016312	47	29	0.618421	2.02527	0.0105351	1.07656	0.607657	1.43683	0.205503	1.31669	0.32384	0.00338181	0.766198	788	441	199	150	0	0	0	606	365	125	124	0
[truncated: 6 more columns]

## Sheet: S4a Questionnaire scales
Table S4a. Validated mental health, fatigue and quality of life questionnaire scales. The table shows the association of SARS-CoV-2 status, the severity scale, severity categories and time since diagnosis with scores from questionnaires, using linear regression adjusting for age and sex, as well as comparison of scores for individuals that had answers from both before and during the pandemic (obt…
				SARS-CoV-2 cases vs controls (iStopMM controls added, only using individuals over 45)						SARS-CoV-2 cases vs dHS controls (only contemporary controls available)								The effect of SARS-CoV-2 status on the difference between pandemic and pre-pandemic answers, adjusting for age and sex and time between measures (linear regression)					Severity Scale				Severity category 1 vs 2-4				Severity category 1 vs 3-4				Severity category 1 vs 4				Time since SARS-CoV-2 diagnosis
Scale	Trait	Description	Direction of scale	N cases	N controls	Effect	CI lower	CI upper	P-value	N cases	N controls	Mean Cases	Mean Controls	Effect	CI lower	CI upper	P-value	N	Effect	CI lower	CI upper	P-value	Effect	CI lower	CI upper	P-value	Effect	CI lower	CI upper	P-value	Effect	CI lower	CI upper	P-value	Effect	CI lower	CI upper	P-value	Effect	CI lower	CI upper	P-value
General Anxiety Disorder-7 (GAD-7)	General Anxiety Disorder-7 (GAD-7)	Evaluates anxiety symptoms	Higher score indicates more symptoms	877	34220	-0.509755	-0.75043	-0.26908	3.30552e-05	1492	557	3.69169	3.64811	-0.0676044	-0.4177	0.282491	0.705073	19885	-0.335572	-0.709736	0.0385923	0.0787747	0.389695	0.288335	0.491055	4.86401e-14	1.18592	0.819591	1.55224	2.22195e-10	1.3371	0.905929	1.76827	1.21569e-09	2.61856	1.7657	3.47142	1.76767e-09	0.0373361	-0.0500417	0.124714	0.402312
36-Item Short Form Survey (36-SF)	Mental Component Summary scores correlated (MCSc)	Evaluates mental health component of health related quality of life	Higher score indicates better health	767	28228	-0.0884324	-0.159001	-0.0178639	0.014043	1337	427	-0.360309	-0.339055	-0.0523615	-0.165499	0.0607764	0.364349	14834	-0.147333	-0.252671	-0.0419948	0.00611809	-0.175783	-0.20656	-0.145006	4.33233e-29	-0.490352	-0.603054	-0.37765	1.49271e-17	-0.650467	-0.784767	-0.516166	2.2447e-21	-1.09412	-1.361	-0.827238	9.33357e-16	-0.00486185	-0.0325978	0.0228741	0.73117
36-Item Short Form Survey (36-SF)	Mental Component Summary scores uncorrelated (MCSuc)	Evaluates mental health component of health related quality of life	Higher score indicates better health	767	28228	-0.0997039	-0.169483	-0.0299244	0.00510188	1337	427	-0.255412	-0.190158	-0.00359917	-0.118759	0.111561	0.951154	14834	-0.114894	-0.233317	0.0035287	0.0572238	-0.129135	-0.16079	-0.0974798	1.2883e-15	-0.357349	-0.472243	-0.242454	1.08729e-09	-0.464501	-0.600965	-0.328037	2.5319e-11	-0.839766	-1.11571	-0.563824	2.44929e-09	-0.00674289	-0.0346439	0.0211581	0.63573
Patient Health Questionnaire-9 (PHQ-9)	Patient Health Questionnaire-9 (PHQ-9)	Evaluates depressive symptoms	Higher score indicates more symptoms	877	34251	-0.169093	-0.450559	0.112372	0.238999	1493	557	5.44742	5.01257	0.316654	-0.111516	0.744824	0.147192	19981	0.355957	-0.113993	0.825908	0.137657	0.662159	0.539706	0.784612	3.02443e-26	1.90222	1.45596	2.34848	6.56409e-17	2.40254	1.86503	2.94005	1.93942e-18	4.31239	3.27192	5.35286	4.52868e-16	-0.0259909	-0.133118	0.0811367	0.634411
36-Item Short Form Survey (36-SF)	Physical Component Summary scores correlated (PCSc)	Evaluates pysical health component of health related quality of life	Higher score indicates better health	767	28228	-0.0163771	-0.0866708	0.0539166	0.647928	1337	427	0.121948	0.257654	-0.14058	-0.238923	-0.0422372	0.00508183	14834	-0.148752	-0.23269	-0.0648148	0.00051377	-0.196893	-0.22334	-0.170447	3.15683e-48	-0.556099	-0.654068	-0.458129	9.43387e-29	-0.760212	-0.877105	-0.643319	3.24609e-37	-1.14017	-1.34883	-0.931502	9.16531e-27	0.0020358	-0.0224214	0.026493	0.870401
36-Item Short Form Survey (36-SF)	Physical Component Summary scores uncorrelated (PCSuc)	Evaluates physical health component of health related quality of life	Higher score indicates better health	767	28228	0.0178397	-0.0514761	0.0871554	0.613952	1337	427	0.256579	0.392865	-0.147691	-0.243746	-0.0516371	0.00258116	14834	-0.116883	-0.210877	-0.0228886	0.0147982	-0.162864	-0.188997	-0.136731	2.58702e-34	-0.462524	-0.55844	-0.366608	3.34168e-21	-0.640854	-0.754801	-0.526908	2.94802e-28	-0.910775	-1.11216	-0.709394	7.69277e-19	0.00453524	-0.0190761	0.0281466	0.706564
Perceived Stress Scale (PSS)	Perceived Stress Scale (PSS)	Evaluates stress symptoms	Higher score indicates more symptoms	882	34368	-1.94682	-2.34916	-1.54447	2.4508e-21	1498	557	10.8705	10.7433	-0.0875719	-0.732617	0.557473	0.790169	20123	-1.72696	-2.39396	-1.05997	3.87986e-07	0.810026	0.62484	0.995212	1.00583e-17	2.50765	1.83759	3.17772	2.21558e-13	2.85356	2.05946	3.64765	1.87862e-12	5.16478	3.56915	6.7604	2.23588e-10	0.0248602	-0.135809	0.185529	0.761684
Satisfaction With Life Scale (SWLS)	Satisfaction With Life Scale (SWLS)	Evaluates satisfaction with life	Higher score indicates better health	880	34561	0.668896	0.286641	1.05115	0.000604145	1496	557	26.236	25.8366	0.419504	-0.128363	0.967372	0.133413	20381	0.0834338	-0.581608	0.748476	0.805764	-0.386668	-0.547692	-0.225645	2.51897e-06	-1.10467	-1.68517	-0.524168	0.000191628	-1.35899	-2.06129	-0.656693	0.000149	-1.89621	-3.35158	-0.440842	0.0106586	-0.113153	-0.249497	0.0231905	0.103816
Short Health Anxiety Inventory (SHAI)	Short Health Anxiety Inventory (SHAI)	Evaluates health anxiety symptoms	Higher score indicates more symptoms							1486	557	161.408	161.524	-0.249545	-1.07507	0.575975	0.553526						0.820124	0.580426	1.05982	1.99892e-11	2.46113	1.59683	3.32542	2.38849e-08	3.1182	2.0672	4.16919	6.05894e-09	4.61219	2.25039	6.97399	0.000129431	-0.153154	-0.376164	0.0698552	0.178286
The Symptom Impact Questionnaire (SIQR)	The Symptom Impact Questionnaire (SIQR)	Evaluates impact of pain, fatigue and related symptoms	Higher score indicates more symptoms							1336	851	15.7459	13.9197	1.76473	0.53312	2.99635	0.00497866						2.65317	2.22683	3.07952	3.21789e-34	6.93198	5.39987	8.4641	7.44989e-19	9.89871	8.00708	11.7903	1.10659e-24	13.9684	10.48	17.4569	4.21814e-15	-0.0519635	-0.41244	0.308513	0.777531

## Sheet: S4b Questionnaire scales adj
Table S4b. Validated mental health, fatigue and quality of life questinnaire scales adjusted for comorbidities. The table shows the association of SARS-CoV-2 status, the severity scale, severity categories and time since diagnosis with scores from questionnaires, using a linear regression adjusting for age, sex, BMI, hypertension, asthma, type 2 diabetes, cancer and coronary artery disease, as we…
				SARS-CoV-2 cases vs controls (iStopMM controls added, only using individuals over 45)						SARS-CoV-2 cases vs dHS controls (only contemporary controls available)								The effect of SARS-CoV-2 status on the difference between pandemic and pre-pandemic answers, adjusting for age and sex and time between measures (linear regression)					Severity Scale				Severity category 1 vs 2-4				Severity category 1 vs 3-4				Severity category 1 vs 4				Time since SARS-CoV-2 diagnosis
Scale	Name	Description	Direction of scale	N cases	N controls	Effect	CI lower	CI upper	P-value	N cases	N controls	Mean Cases	Mean Controls	Effect	CI lower	CI upper	P-value	N	Effect	CI lower	CI upper	P-value	Effect	CI lower	CI upper	P-value	Effect	CI lower	CI upper	P-value	Effect	CI lower	CI upper	P-value	Effect	CI lower	CI upper	P-value	Effect	CI lower	CI upper	P-value
Perceived Stress Scale (PSS)	Perceived Stress Scale (PSS)	Evaluates stress symptoms	Higher score indicates more symptoms	828	5703	-1.51392	-1.95328	-1.07456	1.44147e-11	1406	473	10.7575	10.37	0.0583179	-0.620951	0.737587	0.866368	3680	-1.47232	-2.18878	-0.755856	5.63093e-05	0.763929	0.569579	0.958279	1.31722e-14	2.2899	1.59409	2.98571	1.11605e-10	2.63617	1.79835	3.47399	6.95548e-10	5.22444	3.52866	6.92022	1.55588e-09	-0.0135469	-0.177805	0.150711	0.871583
36-Item Short Form Survey (36-SF)	Mental Component Summary scores correlated (MCSc)	Evaluates mental health component of health related quality of life	Higher score indicates better health	719	4703	-0.128544	-0.205734	-0.0513539	0.0010986	1257	362	-0.23964	-0.134221	-0.0649787	-0.184414	0.0544562	0.28627	3680	-0.158591	-0.271396	-0.045786	0.00585957	-0.161463	-0.19382	-0.129105	1.36711e-22	-0.428649	-0.5452	-0.312097	5.66016e-13	-0.581006	-0.722858	-0.439154	9.91728e-16	-1.08111	-1.36604	-0.796183	1.03068e-13	0.00368364	-0.0243613	0.0317286	0.796838
36-Item Short Form Survey (36-SF)	Mental Component Summary scores uncorrelated (MCSuc)	Evaluates mental health component of health related quality of life	Higher score indicates better health	719	4703	-0.123014	-0.200817	-0.0452118	0.00194189	1257	362	-0.344217	-0.289792	-0.00865082	-0.131213	0.113911	0.889969	3680	-0.125396	-0.252932	0.00213901	0.0539638	-0.124877	-0.15827	-0.0914843	2.30686e-13	-0.326426	-0.445875	-0.206976	8.49915e-08	-0.438396	-0.583132	-0.29366	2.90768e-09	-0.894209	-1.18984	-0.598573	3.05887e-09	-0.00261562	-0.0310731	0.0258419	0.857035
Satisfaction With Life Scale (SWLS)	Satisfaction With Life Scale (SWLS)	Evaluates satisfaction with life	Higher score indicates better health	826	5746	0.494344	0.0806979	0.907991	0.0191615	1404	473	26.2642	25.9746	0.349205	-0.235057	0.933468	0.241412	3680	-0.101299	-0.801392	0.598794	0.776718	-0.328104	-0.498146	-0.158061	0.00015564	-0.853674	-1.46024	-0.247104	0.0058074	-1.10782	-1.85341	-0.362231	0.00358854	-1.62855	-3.21334	-0.0437618	0.0439966	-0.0867983	-0.227736	0.0541398	0.227398
General Anxiety Disorder-7 (GAD-7)	General Anxiety Disorder-7 (GAD-7)	Evaluates anxiety symptoms	Higher score indicates more symptoms	823	5676	-0.279677	-0.534207	-0.0251463	0.0312686	1400	473	3.66357	3.43763	0.0660274	-0.30634	0.438394	0.728183	3680	-0.310949	-0.694989	0.07309	0.112518	0.383695	0.27616	0.491231	2.6826e-12	1.12921	0.744515	1.5139	8.75102e-09	1.29078	0.831308	1.75026	3.66801e-08	2.62209	1.70274	3.54144	2.26915e-08	0.0294962	-0.0608639	0.119856	0.522301
36-Item Short Form Survey (36-SF)	Physical Component Summary scores correlated (PCSc)	Evaluates pysical health component of health related quality of life	Higher score indicates better health	719	4703	-0.0758848	-0.148591	-0.00317855	0.0407872	1257	362	0.128959	0.301024	-0.164668	-0.26538	-0.0639568	0.00135205	3680	-0.156119	-0.244841	-0.0673976	0.000562835	-0.166098	-0.193231	-0.138966	3.61028e-33	-0.453057	-0.551429	-0.354684	1.7672e-19	-0.623668	-0.743233	-0.504103	1.55402e-24	-0.974627	-1.19127	-0.757982	1.17049e-18	0.0166867	-0.00724462	0.040618	0.171732
36-Item Short Form Survey (36-SF)	Physical Component Summary scores uncorrelated (PCSuc)	Evaluates physical health component of health related quality of life	Higher score indicates better health	719	4703	-0.0369188	-0.108868	0.0350308	0.314552	1257	362	0.258324	0.421391	-0.171419	-0.269977	-0.07286	0.00065216	3680	-0.120983	-0.221221	-0.0207452	0.0179989	-0.131753	-0.158494	-0.105011	4.6086e-22	-0.364325	-0.460439	-0.26821	1.0906e-13	-0.50546	-0.621415	-0.389505	1.29856e-17	-0.716192	-0.924509	-0.507874	1.60097e-11	0.0185911	-0.0045235	0.0417057	0.114927
Patient Health Questionnaire-9 (PHQ-9)	Patient Health Questionnaire-9 (PHQ-9)	Evaluates depressive symptoms	Higher score indicates more symptoms	823	5681	0.0676725	-0.229337	0.364682	0.655179	1401	473	5.41685	4.72304	0.481414	0.0360161	0.926811	0.0341335	3680	0.337166	-0.139366	0.813699	0.165509	0.587268	0.459861	0.714675	1.64934e-19	1.62972	1.17121	2.08824	3.24874e-12	2.07081	1.50734	2.63428	5.88241e-13	4.03371	2.93382	5.13359	6.56983e-13	-0.0537663	-0.162201	0.054668	0.331125
The Symptom Impact Questionnaire (SIQR)	The Symptom Impact Questionnaire (SIQR)	Evaluates impact of pain, fatigue and related symptoms	Higher score indicates more symptoms							1238	822	15.5	13.9351	1.46322	0.242267	2.68416	0.0188283						2.28823	1.84473	2.73173	4.85641e-24	5.84238	4.27541	7.40934	2.71576e-13	8.12029	6.15832	10.0823	4.97417e-16	13.3452	9.55414	17.1363	5.21809e-12	-0.195663	-0.559121	0.167795	0.29136
Short Health Anxiety Inventory (SHAI)	Short Health Anxiety Inventory (SHAI)	Evaluates health anxiety symptoms	Higher score indicates more symptoms							1396	473	161.431	161.323	-0.095783	-0.927974	0.736408	0.82152						0.861359	0.606009	1.11671	3.80265e-11	2.5544	1.64185	3.46695	4.10173e-08	3.24219	2.12011	4.36427	1.48483e-08	5.46338	2.92024	8.00653	2.54666e-05	-0.22104	-0.434348	-0.00773097	0.0422513

## Sheet: S5a Physiological tests
Table S5a. Physiological test measures. The associations of SARS-CoV-2 status, the severity scale, severity categories and time since diagnosis with physiological measures. The association of SARS-CoV-2 status was performed separately using all available controls and only using contemporary controls. Furthermore, historic controls were compared to contemporary controls. For binary traits, the eff…
						SARS-CoV-2 cases vs controls					SARS-CoV-2 cases vs contemporary controls				Contemporary controls vs historic controls				Severity Scale				Severity category 1 vs 2-4				Severity category 1 vs 3-4				Severity category 1 vs 4				Time since SARS-CoV-2 diagnosis
Test	Trait	Unit	Type of trait	N cases	N controls	Effect	CI lower	CI upper	P-value	Controls used	Effect	CI lower	CI upper	P-value	Effect	CI lower	CI upper	P-value	Effect	CI lower	CI upper	P-value	Effect	CI lower	CI upper	P-value	Effect	CI lower	CI upper	P-value	Effect	CI lower	CI upper	P-value	Effect	CI lower	CI upper	P-value
Smell	Partial anosmia		Binary	1685	14024	3.85579	3.59598	4.11561	4.16225e-20	All controls	3.80586	3.07278	4.53894	2.17659e-05	1.02672	0.308494	1.74495	0.942845	1.17366	1.03761	1.32755	0.0111299	1.98732	1.18159	3.3425	0.0067769	2.15952	1.22172	3.81719	0.00673076	2.12807	0.758592	5.96986	0.170369	0.94386	0.844885	1.05443	0.29618
Smell	Hyposmia lemon		Binary	1685	14024	2.04198	1.86954	2.21441	1.71923e-14	All controls	2.75228	2.32113	3.18342	3.01403e-07	0.714344	0.303149	1.12554	0.093046	1.06327	0.975365	1.15911	0.164881	1.3179	0.943716	1.84046	0.101688	1.36448	0.935384	1.99042	0.10623	0.868875	0.402781	1.87433	0.717457	0.800551	0.731085	0.876617	2.01038e-07
Smell	Hyposmia		Binary	1685	14024	1.89336	1.73513	2.0516	5.19906e-14	All controls	2.78491	2.3842	3.18563	2.4206e-08	0.658887	0.278067	1.03971	0.0228481	1.10657	1.02109	1.19921	0.0139545	1.49728	1.10082	2.03654	0.00899213	1.58139	1.1139	2.24507	0.0101789	1.4587	0.718658	2.96081	0.308066	0.829578	0.765875	0.89858	9.53843e-07
Smell	Odor intensity lemon	Scale from 0 to 7	Quantitative	1685	14022	-0.23643	-0.298016	-0.174844	5.29196e-14	All controls	-0.324527	-0.449157	-0.199896	3.33139e-07	0.0972309	-0.00336398	0.197826	0.0581645	-0.0110137	-0.0481254	0.026098	0.560788	-0.0692433	-0.20146	0.062973	0.304667	-0.0784926	-0.233468	0.0764828	0.320852	0.113986	-0.20244	0.430412	0.480158	0.0635505	0.0340444	0.0930566	2.42717e-05
Smell	Hyposmia cinnamon		Binary	1685	14024	1.73423	1.57378	1.89469	1.15452e-10	All controls	2.28954	1.91573	2.66335	2.65819e-06	0.730495	0.3777	1.08329	0.0693019	1.11472	1.0283	1.2084	0.00856672	1.36425	0.99772	1.86543	0.0491013	1.53996	1.08493	2.18585	0.015403	1.39361	0.731491	2.65504	0.320987	0.896971	0.831419	0.967691	0.00356011
Smell	Identification lemon		Binary	1660	13930	0.704455	0.590898	0.818011	9.58419e-10	All controls	0.739346	0.537525	0.941166	0.00345947	0.980351	0.798439	1.16226	0.830614	1.0363	0.975716	1.10064	0.246298	1.14687	0.927083	1.41875	0.206029	1.16566	0.903215	1.50436	0.23872	1.02834	0.581212	1.81943	0.923628	1.01965	0.972998	1.06854	0.4161
Smell	Odor pleasantness lemon	Scale from 1 to 7	Quantitative	1660	13930	-0.175964	-0.232474	-0.119454	1.03995e-09	All controls	-0.113211	-0.215981	-0.010441	0.0308402	-0.0595198	-0.152829	0.0337896	0.211213	-0.0294721	-0.0595237	0.000579468	0.0545798	-0.0532952	-0.160427	0.0538365	0.329536	-0.112026	-0.240468	0.0164159	0.087359	-0.222415	-0.484128	0.0392993	0.0957764	-0.00467498	-0.028582	0.019232	0.701516
Smell	Hyposmia licorice		Binary	1685	14024	1.6409	1.47439	1.80741	2.1886e-08	All controls	3.68927	3.216	4.16253	3.20159e-10	0.426038	-0.0272406	0.879316	2.86169e-05	1.07012	0.982866	1.16511	0.119646	1.46124	1.04742	2.03855	0.0233773	1.44649	0.989846	2.11381	0.0560331	1.24221	0.611247	2.5245	0.553921	0.824099	0.755742	0.898638	2.73743e-06
Smell	Odor pleasantness fish	Scale from 1 to 7	Quantitative	1673	13919	-0.163633	-0.231209	-0.0960563	2.07442e-06	All controls	-0.147953	-0.263718	-0.032189	0.0122455	-0.0287384	-0.141694	0.0842174	0.618015	-0.0560014	-0.0890632	-0.0229395	0.000900434	-0.204824	-0.322385	-0.0872623	0.000638168	-0.248281	-0.390289	-0.106273	0.000610764	-0.0633799	-0.372329	0.245569	0.687619	-0.0127462	-0.0391544	0.0136619	0.344139
Smell	Identification peppermint		Binary	1678	13977	0.748957	0.630975	0.86694	2.16508e-06	All controls	0.766396	0.540107	0.992685	0.0196624	0.988667	0.782794	1.19454	0.913662	1.11189	1.04284	1.18551	0.0010573	1.16313	0.931459	1.45241	0.182956	1.44855	1.09913	1.90907	0.00807357	1.7711	0.983894	3.18815	0.049082	1.00785	0.958989	1.05919	0.757522
Smell	Identification banana		Binary	1672	13971	0.751498	0.629001	0.873995	3.33727e-06	All controls	0.782111	0.561918	1.0023	0.0299656	0.972012	0.777687	1.16634	0.774249	1.04375	0.976705	1.11539	0.207049	1.2351	0.974889	1.56476	0.0789608	1.18585	0.892883	1.57494	0.239418	1.33495	0.719978	2.47521	0.367136	0.995234	0.944855	1.0483	0.856818
Smell	Identification score	Scale from 0 to 12	Quantitative	1600	13702	-0.308469	-0.438789	-0.17815	3.49463e-06	All controls	-0.589091	-0.829886	-0.348297	1.62648e-06	0.324787	0.112384	0.53719	0.00272602	0.0292199	-0.0411041	0.0995439	0.415423	0.182	-0.0671204	0.431119	0.152168	0.107937	-0.192626	0.4085	0.481515	-0.0159138	-0.634469	0.602641	0.959783	0.0458991	-0.0103411	0.102139	0.109686
Smell	Odor pleasantness cinnamon	Scale from 1 to 7	Quantitative	1648	13843	0.136598	0.0768319	0.196363	7.47549e-06	All controls	-0.155897	-0.262528	-0.0492655	0.00416283	0.308338	0.209744	0.406933	8.81098e-10	-0.0029245	-0.0345824	0.0287333	0.856319	0.00177023	-0.110593	0.114133	0.975366	-0.036372	-0.169812	0.0970678	0.593174	-0.17366	-0.450313	0.102993	0.218575	0.00778519	-0.0174891	0.0330595	0.546019
Smell	Hyposmia peppermint		Binary	1685	14024	1.90392	1.62191	2.18593	2.7203e-05	All controls	1.97929	1.32888	2.6297	0.027055	0.967145	0.352737	1.58155	0.914726	0.928043	0.80061	1.07576	0.316857	0.645416	0.380845	1.09378	0.105138	0.695687	0.378823	1.27759	0.237879	0.443862	0.123543	1.59469	0.177547	0.877273	0.76381	1.00759	0.0514514
Taste	Partial ageusia		Binary	1694	552	2.88927	2.32184	3.45671	3.51899e-05	Contemporary controls	2.88927	2.32184	3.45671	3.51899e-05	NA	NA	NA	NA	1.15646	1.03819	1.28819	0.00841577	1.69917	1.09063	2.64728	0.0157236	2.06658	1.27893	3.3393	0.00250017	1.58677	0.648911	3.88009	0.324923	0.971743	0.883777	1.06847	0.549741
Smell	Hyposmia fish		Binary	1685	14024	1.78684	1.52692	2.04676	3.62738e-05	All controls	3.69091	2.90792	4.47391	0.000108061	0.464671	-0.290784	1.22013	0.0245611	1.04658	0.917607	1.19368	0.498831	1.37918	0.820215	2.31908	0.217967	1.54068	0.864881	2.74454	0.13992	0.906332	0.280615	2.92727	0.868397	0.905501	0.7993	1.02581	0.105361
Smell	Identification fish		Binary	1673	13919	0.801185	0.692477	0.909892	7.28798e-05	All controls	0.840499	0.634436	1.04656	0.0966417	0.953147	0.769125	1.13717	0.610193	0.958444	0.904248	1.01589	0.153281	0.886865	0.719344	1.0934	0.260487	0.8249	0.644996	1.05498	0.125442	0.931147	0.560603	1.54661	0.783236	1.02321	0.976278	1.0724	0.336499
Vital signs	Heart rate	Beats per min	Quantitative	1698	14393	-1.16633	-1.75863	-0.574031	0.000113593	All controls	0.761211	-0.36137	1.88379	0.183829	-2.10152	-3.08897	-1.11407	3.02824e-05	-0.0988581	-0.421092	0.223376	0.547635	-0.381948	-1.52883	0.764936	0.513923	-0.832037	-2.19209	0.52802	0.230504	0.979902	-1.95273	3.91253	0.512527	-0.119778	-0.377101	0.137544	0.36159
Grip strength	Grip strength women	kg	Quantitative	868	4606	-0.821252	-1.24629	-0.396217	0.00015241	All controls after 2017	-0.388397	-1.18874	0.411945	0.34152	-0.335649	-1.04094	0.369647	0.350944	-0.339523	-0.5631	-0.115946	0.00291606	-0.971292	-1.77042	-0.172167	0.0172062	-1.06976	-1.99307	-0.146457	0.0231531	-2.79757	-5.0646	-0.530539	0.0155766	0.0190712	-0.167707	0.205849	0.841381
Smell	Odor pleasantness peppermint	Scale from 1 to 7	Quantitative	1678	13977	-0.0945111	-0.144647	-0.0443757	0.000220037	All controls	-0.152754	-0.247136	-0.058371	0.00151307	0.0658656	-0.017084	0.148815	0.119631	-0.00505915	-0.0325827	0.0224644	0.718644	-0.0354872	-0.13344	0.0624654	0.47765	-0.0417751	-0.15764	0.0740897	0.479766	-0.131997	-0.371515	0.107521	0.280079	0.00524013	-0.0166024	0.0270826	0.638202
Grip strength	Grip strength	kg	Quantitative	1695	8100	-0.726585	-1.12257	-0.330596	0.000322742	All controls after 2017	-0.471349	-1.19947	0.256773	0.204511	-0.218195	-0.858008	0.421618	0.503867	-0.229018	-0.437044	-0.0209929	0.0309439	-0.374603	-1.1154	0.366196	0.321626	-0.536853	-1.40881	0.335107	0.227531	-2.53464	-4.4052	-0.664077	0.0079114	0.129618	-0.0359287	0.295165	0.124877
Smell	Odor pleasantness scale	Scale from 6 to 42	Quantitative	1600	13702	-0.353325	-0.555217	-0.151432	0.000603299	All controls	-0.682351	-1.05887	-0.305834	0.000382235	0.342353	0.0142322	0.670474	0.0408534	-0.0888578	-0.201475	0.0237591	0.121985	-0.196639	-0.595943	0.202666	0.33444	-0.416743	-0.894355	0.0608679	0.0872265	-0.552997	-1.57115	0.465159	0.287081	0.00148313	-0.0887306	0.0916969	0.974294
Smell	Hyposmia banana		Binary	1685	14024	1.44964	1.22619	1.67309	0.00170481	All controls	2.51808	1.94718	3.08899	0.00044505	0.559218	0.0193288	1.09911	0.0212722	1.05621	0.942513	1.18362	0.348339	1.35683	0.864426	2.12972	0.178494	1.35462	0.813598	2.2554	0.242105	1.08359	0.426678	2.75187	0.866635	0.843619	0.750576	0.948196	0.00240068
Sleep	Heart rate	Beats per min	Quantitative	422	2670	1.57477	0.525253	2.62428	0.00327232	All controls	2.31037	0.0268036	4.59394	0.0473668	-0.686463	-2.56916	1.19624	0.474827	0.464757	-0.0829977	1.01251	0.0963096	1.98259	-0.0496567	4.01484	0.0558623	1.98089	-0.287014	4.24879	0.0869054	1.39914	-3.46751	6.2658	0.5731	0.560989	-0.0786986	1.20068	0.0856384
Spirometry	FVC	%	Quantitative	1561	12927	0.990987	0.329293	1.65268	0.0033312	All controls	0.0440966	-1.07929	1.16748	0.938674	1.00594	-0.111877	2.12375	0.0777602	-0.123684	-0.440858	0.19349	0.44468	0.28323	-0.837205	1.40367	0.620275	-0.180444	-1.53048	1.16959	0.793343	-0.638236	-3.49103	2.21456	0.661026	0.233892	-0.0204304	0.488214	0.0714593
Smell	Odor pleasantness licorice	Scale from 1 to 7	Quantitative	1642	13856	-0.0773361	-0.132289	-0.0223834	0.00580937	All controls	-0.0664347	-0.171913	0.0390441	0.217022	-0.00654858	-0.096499	0.0834019	0.886533	-0.0135465	-0.0444153	0.0173223	0.389717	0.00716576	-0.10255	0.116882	0.89814	-0.0454707	-0.176552	0.0856102	0.496564	-0.0607517	-0.341105	0.219601	0.671036	0.0204619	-0.00417575	0.0450996	0.103566
Smell	Identification cinnamon		Binary	1648	13843	1.15661	1.04733	1.26588	0.00925301	All controls	0.840278	0.641857	1.0387	0.0857043	1.42756	1.24897	1.60615	0.000100907	0.992758	0.936515	1.05238	0.807006	1.05005	0.854956	1.28965	0.64134	0.989511	0.774129	1.26482	0.932902	0.761071	0.442845	1.30797	0.31838	1.0025	0.957599	1.04951	0.914829
Smell	Odor intensity scale	Scale from 0 to 42	Quantitative	1685	14024	-0.297519	-0.539848	-0.05519	0.0161112	All controls	-1.37325	-1.89011	-0.856392	1.91339e-07	1.16551	0.774547	1.55646	5.12522e-09	-0.118606	-0.275151	0.0379377	0.137543	-0.481317	-1.03904	0.0764062	0.0907439	-0.638654	-1.28175	0.00444126	0.051599	0.123108	-1.17028	1.4165	0.852008	0.26843	0.144653	0.392206	2.13208e-05
CPET	VO2 max	(mL/min)/kg	Quantitative	1494	7969	-0.417508	-0.770601	-0.0644151	0.020473	All controls	-0.990252	-1.7045	-0.276003	0.00657987	0.637117	0.0576362	1.2166	0.0311661	-0.494258	-0.695601	-0.292915	1.49867e-06	-1.32886	-2.02791	-0.629814	0.000194637	-1.79236	-2.64296	-0.941765	3.62639e-05	-3.64563	-5.65988	-1.63139	0.000388979	-0.142245	-0.301021	0.0165297	0.0790971
Taste	Taste pleasantness sweet	Scale from 1 to 7	Quantitative	1592	539	0.10258	0.0154298	0.18973	0.021054	Contemporary controls	0.10258	0.0154298	0.18973	0.021054	NA	NA	NA	NA	0.00265684	-0.0231748	0.0284884	0.840237	-0.053732	-0.144732	0.0372677	0.247146	-0.0209946	-0.131121	0.0891318	0.70866	0.0910086	-0.14401	0.326027	0.447859	0.0158129	-0.00457027	0.0361961	0.128377
Smell	Odor intensity cinnamon	Scale from 0 to 7	Quantitative	1685	14024	-0.0715408	-0.1329	-0.0101814	0.0222996	All controls	-0.285124	-0.412972	-0.157277	1.23577e-05	0.2299	0.130253	0.329548	6.12595e-06	-0.036307	-0.0747566	0.00214264	0.0642017	-0.112302	-0.24935	0.0247458	0.108253	-0.170304	-0.333283	-0.00732407	0.0405522	0.0798827	-0.244989	0.404754	0.629845	0.0525564	0.0220921	0.0830208	0.000721309
Spirometry	FEV1	%	Quantitative	1561	12927	0.849092	0.11363	1.58455	0.0236466	All controls	-0.846291	-2.04496	0.352375	0.166416	1.75666	0.510619	3.0027	0.00572386	-0.118971	-0.461335	0.223394	0.495812	0.592665	-0.616444	1.80177	0.336689	-0.111105	-1.54907	1.32686	0.879628	-0.710208	-3.63602	2.2156	0.634239	0.114367	-0.159079	0.387814	0.412354
Taste	Taste intensity sweet	Scale from 0 to 7	Quantitative	1694	552	-0.14644	-0.273359	-0.0195211	0.0237306	Contemporary controls	-0.14644	-0.273359	-0.0195211	0.0237306	NA	NA	NA	NA	-0.0503294	-0.0879816	-0.0126773	0.00879499	-0.176663	-0.310766	-0.0425596	0.00982196	-0.243218	-0.403016	-0.0834204	0.00285259	-0.167795	-0.495947	0.160358	0.316242	0.0399038	0.0101109	0.0696967	0.00866063
DXA	LMI	kg/m2	Quantitative	1690	14196	-0.119362	-0.232261	-0.00646292	0.0382468	All controls	0.00962975	-0.192784	0.212043	0.925708	-0.112016	-0.301303	0.0772701	0.246092	0.106144	0.0477561	0.164532	0.000366502	0.297846	0.0897085	0.505983	0.0050352	0.388371	0.147482	0.62926	0.00157772	0.798679	0.306346	1.29101	0.0014749	0.0568492	0.010788	0.10291	0.015561
Smell	Odor intensity peppermint	Scale from 0 to 7	Quantitative	1685	14024	-0.0533491	-0.104666	-0.00203265	0.0415864	All controls	-0.131504	-0.233359	-0.02965	0.011388	0.0852641	0.00106963	0.169459	0.0471556	-0.0030086	-0.0332482	0.027231	0.84539	-0.0125742	-0.120331	0.0951823	0.819092	-0.0178453	-0.146626	0.110936	0.785931	0.136568	-0.122515	0.395651	0.301532	0.0250784	0.0010377	0.0491191	0.0408941
Grip strength	Grip strength men	kg	Quantitative	827	3494	-0.611305	-1.31121	0.0885973	0.0869164	All controls after 2017	-0.486929	-1.69863	0.724775	0.43091	-0.229128	-1.33737	0.879109	0.685308	-0.100145	-0.456688	0.256397	0.58196	0.276558	-0.987553	1.54067	0.668067	0.121053	-1.41252	1.65463	0.877047	-2.22419	-5.07794	0.629552	0.126609	0.221944	-0.0488774	0.492766	0.108216
Hearing	Hearing impairment at 0.5 kHz		Binary	1695	1495	1.33917	1.00196	1.67638	0.0898168	All controls after 2019	1.24378	0.750294	1.73726	0.378286	1.25311	0.712051	1.79418	0.418586	1.11309	0.982648	1.26085	0.092868	1.06822	0.648933	1.75841	0.794731	1.25342	0.730199	2.15157	0.411285	1.31902	0.555346	3.13285	0.535672	1.05957	0.951633	1.17975	0.300002
Taste	Taste intensity scale	Scale from 0 to 28	Quantitative	1692	552	-0.246326	-0.553235	0.0605831	0.115696	Contemporary controls	-0.246326	-0.553235	0.0605831	0.115696	NA	NA	NA	NA	-0.104147	-0.195809	-0.0124856	0.0259487	-0.296863	-0.623211	0.0294855	0.0746003	-0.532209	-0.926955	-0.137463	0.00822876	-0.295138	-1.10024	0.509967	0.472447	0.0962754	0.024203	0.168348	0.00883955
Smell	Odor intensity banana	Scale from 0 to 7	Quantitative	1685	14024	0.035867	-0.0210563	0.0927904	0.216836	All controls	-0.115887	-0.229043	-0.00273086	0.0447175	0.164824	0.0714688	0.258179	0.000539184	-0.0103791	-0.0436948	0.0229366	0.541455	-0.0297802	-0.148503	0.0889426	0.622972	-0.0486835	-0.186561	0.0891944	0.4889	-0.0426591	-0.321594	0.236276	0.764365	0.0416535	0.0151303	0.0681767	0.00208328
BMI	Obesity		Binary	1690	14196	1.07165	0.961586	1.18172	0.219078	All controls	1.14896	0.937181	1.36073	0.196778	0.942568	0.756068	1.12907	0.53287	1.14965	1.08334	1.22002	4.00461e-06	1.40176	1.12804	1.74188	0.00219755	1.5973	1.2428	2.05292	0.000255703	2.81395	1.68959	4.68653	6.47043e-05	1.03727	0.989168	1.08772	0.132373
Smell	Odor intensity fish	Scale from 0 to 7	Quantitative	1685	14021	0.0376896	-0.0244957	0.0998749	0.234862	All controls	-0.118913	-0.241216	0.00339096	0.0566947	0.174167	0.0721635	0.276171	0.000818024	-0.0181336	-0.05452	0.0182528	0.328673	-0.090642	-0.220266	0.0389818	0.170509	-0.124956	-0.279015	0.0291034	0.111894	-0.0242582	-0.323644	0.275128	0.873817	0.0215968	-0.00748267	0.0506762	0.145488
Taste	Taste intensity bitter	Scale from 0 to 7	Quantitative	1694	552	-0.0716389	-0.196603	0.0533255	0.261175	Contemporary controls	-0.0716389	-0.196603	0.0533255	0.261175	NA	NA	NA	NA	-0.0120229	-0.0492935	0.0252477	0.527214	0.0235148	-0.109233	0.156262	0.728447	-0.0890333	-0.251135	0.073068	0.281695	0.114022	-0.209071	0.437115	0.489125	0.0330963	0.00395891	0.0622338	0.0259937
OI 5 min	Heart rate difference	Beats per min	Quantitative	1666	527	0.575557	-0.452953	1.60407	0.272719	Contemporary controls	0.575557	-0.452953	1.60407	0.272719	NA	NA	NA	NA	-0.125446	-0.397818	0.146925	0.366675	-0.0950312	-1.06426	0.874197	0.847605	-0.279196	-1.41345	0.855059	0.629484	-0.991718	-3.3908	1.40737	0.417819	0.0353602	-0.180589	0.25131	0.748259
Sleep	Heart rate variability		Quantitative	422	2670	4.65487	-3.72129	13.031	0.276053	All controls	-5.01515	-22.7273	12.697	0.578915	11.054	-4.06382	26.1719	0.15182	0.0494291	-4.09062	4.18947	0.98133	-2.36185	-17.7358	13.0121	0.763331	-2.89239	-20.3086	14.5239	0.744799	-17.9467	-53.576	17.6826	0.323514	-1.72843	-6.59522	3.13836	0.486371
Taste	Taste pleasantness scale	Scale from 4 to 28	Quantitative	1581	538	0.14253	-0.114613	0.399673	0.277305	Contemporary controls	0.14253	-0.114613	0.399673	0.277305	NA	NA	NA	NA	-0.0352932	-0.112193	0.0416069	0.368365	-0.138494	-0.409212	0.132225	0.316009	-0.139253	-0.460384	0.181878	0.395368	-0.272382	-0.933385	0.38862	0.419282	-0.00189775	-0.0625464	0.0587509	0.951096
Taste	Taste intensity salty	Scale from 0 to 7	Quantitative	1693	552	-0.051593	-0.14935	0.0461634	0.300935	Contemporary controls	-0.051593	-0.14935	0.0461634	0.300935	NA	NA	NA	NA	-0.0202594	-0.0490719	0.00855316	0.168153	-0.0590686	-0.161627	0.0434894	0.258953	-0.113229	-0.236691	0.0102324	0.0722472	-0.0914282	-0.344689	0.161833	0.479214	0.0247388	0.00206811	0.0474094	0.0324519
Vital signs	Diastolic blood pressure	mmHg	Quantitative	1693	14381	0.257551	-0.266955	0.782056	0.335835	All controls	1.2039	0.253005	2.15479	0.0130831	-0.910458	-1.78673	-0.0341884	0.0417031	-0.0973429	-0.374577	0.179891	0.491327	0.344471	-0.642178	1.33112	0.493787	-0.157377	-1.32761	1.01286	0.792097	-1.92972	-4.3663	0.506859	0.120595	0.254295	0.0335244	0.475065	0.0239688
Vital signs	Systolic blood pressure	mmHg	Quantitative	1693	14381	0.383514	-0.408123	1.17515	0.342348	All controls	2.79449	1.42122	4.16777	6.6513e-05	-2.5425	-3.87589	-1.20912	0.000185982	-0.357975	-0.756272	0.0403219	0.0781407	-0.307729	-1.72647	1.11102	0.670743	-1.03115	-2.72733	0.66504	0.233448	-1.11033	-4.63104	2.41039	0.536494	-0.0858268	-0.401506	0.229852	0.594113
CPET	Load	W	Quantitative	1496	7992	0.893159	-1.39874	3.18505	0.444976	All controls	-5.15868	-9.86152	-0.455846	0.0315566	7.0694	3.35512	10.7837	0.000191117	-2.38044	-3.69897	-1.06192	0.000402335	-6.33466	-10.907	-1.76228	0.00661922	-8.35051	-13.7908	-2.91017	0.00262584	-22.1945	-35.0193	-9.36983	0.000693872	-0.486975	-1.52712	0.553174	0.358813
Hearing	PTA hearing impairment		Binary	1695	1495	1.07621	0.871785	1.28064	0.481049	All controls after 2019	1.03244	0.745541	1.31933	0.827203	1.07385	0.766946	1.38076	0.649202	1.00852	0.931198	1.09227	0.834825	1.04938	0.772817	1.42493	0.757301	1.05098	0.744461	1.48372	0.777506	0.853629	0.453142	1.60807	0.622995	1.06382	0.993039	1.13964	0.0803513
BMI	BMI	kg/m2	Quantitative	1690	14196	-0.0956746	-0.366992	0.175643	0.489469	All controls	0.064664	-0.433807	0.563135	0.799294	-0.121758	-0.575557	0.332042	0.59897	0.366825	0.223028	0.510621	5.73416e-07	0.946304	0.432613	1.45999	0.000305439	1.33149	0.734436	1.92854	1.23678e-05	2.71866	1.51995	3.91737	8.77919e-06	0.0951346	-0.0189336	0.209203	0.102118
Taste	Taste pleasantness sour	Scale from 1 to 7	Quantitative	1691	551	0.0456886	-0.0866248	0.178002	0.498533	Contemporary controls	0.0456886	-0.0866248	0.178002	0.498533	NA	NA	NA	NA	-0.0222383	-0.0610238	0.0165471	0.261097	-0.0709705	-0.208996	0.0670547	0.313549	-0.075596	-0.239745	0.0885529	0.366714	-0.0271744	-0.366285	0.311936	0.875195	-0.0219673	-0.0526282	0.00869358	0.160241
Taste	Identification sour		Binary	1692	552	0.842975	0.340208	1.34574	0.499775	Contemporary controls	0.842975	0.340208	1.34574	0.499775	NA	NA	NA	NA	1.00796	0.879694	1.15494	0.909002	0.95996	0.569642	1.61772	0.877852	0.929052	0.512465	1.68428	0.808465	1.03725	0.355366	3.02754	0.946507	1.0641	0.941834	1.20225	0.307137
OI 5 min	Orthostatic hypotension		Binary	1703	541	1.11677	0.791158	1.44237	0.502924	Contemporary controls	1.11677	0.791158	1.44237	0.502924	NA	NA	NA	NA	0.985292	0.900607	1.07794	0.746239	0.875506	0.633377	1.2102	0.422042	0.911716	0.623712	1.33271	0.632743	1.09432	0.52904	2.26361	0.809174	0.988438	0.91725	1.06515	0.759521
Hearing	Hearing impairment at 6 kHz		Binary	1695	1495	0.948277	0.772654	1.1239	0.553595	All controls after 2019	0.949101	0.710738	1.18746	0.667697	1.03464	0.769609	1.29967	0.801093	1.05122	0.980321	1.12725	0.160623	1.34642	1.04484	1.73505	0.0211457	1.2363	0.919742	1.6618	0.160164	0.982951	0.539947	1.78942	0.95514	0.982461	0.927726	1.04043	0.544439
Spirometry	FEV1/FVC ratio	Ratio	Quantitative	1561	12929	-0.00103126	-0.00453417	0.00247165	0.563921	All controls	-0.00711702	-0.0127365	-0.00149757	0.0130524	0.00600129	7.18939e-05	0.0119307	0.047282	0.000147896	-0.00149041	0.0017862	0.859558	0.00198736	-0.00379862	0.00777335	0.500808	0.000411782	-0.00662024	0.00744381	0.908624	0.00418068	-0.0107316	0.019093	0.58267	-0.000992105	-0.00230572	0.000321512	0.138798
Vital signs	SpO2	%	Quantitative	1692	14220	-0.0345055	-0.151786	0.082775	0.56417	Contemporary controls	-0.0345055	-0.151786	0.082775	0.56417	NA	NA	NA	NA	-0.0435452	-0.0777856	-0.00930491	0.0126799	-0.0954847	-0.217397	0.026428	0.124756	-0.170209	-0.321981	-0.0184375	0.0279417	-0.355193	-0.641587	-0.0687991	0.0150638	-0.0137842	-0.0410938	0.0135254	0.322521
OI 5 min	Diastolic blood pressure difference	mmHg	Quantitative	1666	527	0.235921	-0.569876	1.04172	0.56607	Contemporary controls	0.235921	-0.569876	1.04172	0.56607	NA	NA	NA	NA	0.0363802	-0.199164	0.271924	0.762099	0.466457	-0.371233	1.30415	0.275096	0.435773	-0.574091	1.44564	0.39768	-2.5661	-4.67947	-0.452731	0.0173184	-0.0352135	-0.222018	0.151591	0.711778
Taste	Taste intensity sour	Scale from 0 to 7	Quantitative	1692	552	0.0219214	-0.0705789	0.114422	0.642293	Contemporary controls	0.0219214	-0.0705789	0.114422	0.642293	NA	NA	NA	NA	-0.0223432	-0.0493996	0.00471315	0.105539	-0.0879942	-0.184255	0.00826629	0.0731832	-0.0928841	-0.206405	0.0206365	0.108781	-0.142188	-0.379845	0.0954693	0.240937	-0.00017896	-0.0216625	0.0213046	0.986974
Taste	Identification bitter		Binary	1694	552	1.07475	0.744847	1.40465	0.669844	Contemporary controls	1.07475	0.744847	1.40465	0.669844	NA	NA	NA	NA	1.01183	0.917326	1.11607	0.813917	1.12311	0.788431	1.59985	0.521049	1.04056	0.688156	1.57344	0.850414	0.670951	0.325589	1.38265	0.291365	1.07666	0.989487	1.17152	0.0782169
Hearing	Hearing impairment at 2 kHz		Binary	1695	1495	1.05079	0.818485	1.28309	0.675956	All controls after 2019	1.11539	0.775721	1.45507	0.526437	0.925974	0.574307	1.27764	0.667529	1.03461	0.945511	1.13212	0.459465	1.09424	0.763302	1.56867	0.623287	1.07951	0.722155	1.61371	0.709156	1.30436	0.677451	2.5114	0.430483	1.00119	0.921581	1.08767	0.977651
Smell	Odor pleasantness banana	Scale from 1 to 7	Quantitative	1672	13971	-0.0108264	-0.0680499	0.0463971	0.710771	All controls	-0.0900536	-0.197059	0.016952	0.0990464	0.0796856	-0.0147409	0.174112	0.0981224	0.00380324	-0.0276903	0.0352968	0.812894	0.0133256	-0.0988888	0.12554	0.815953	0.0141652	-0.118695	0.147025	0.834471	-0.101851	-0.371614	0.167912	0.459291	-0.00126723	-0.0263466	0.0238121	0.921109
DXA	FMI	kg/m2	Quantitative	1690	14196	-0.0336389	-0.216005	0.148728	0.717698	All controls	0.0327789	-0.307274	0.372832	0.850146	-0.0465239	-0.351159	0.258112	0.764688	0.269351	0.17152	0.367182	6.80224e-08	0.673503	0.323712	1.02329	0.000160738	0.979258	0.569391	1.38913	2.82918e-06	1.95482	1.13511	2.77453	2.95155e-06	0.0461852	-0.0317009	0.124071	0.245135
Smell	Odor intensity licorice	Scale from 0 to 7	Quantitative	1685	14024	-0.010748	-0.0740087	0.0525127	0.739131	All controls	-0.397295	-0.529396	-0.265194	3.75344e-09	0.413027	0.310591	0.515462	2.7258e-15	-0.0397645	-0.0793614	-0.000167673	0.0490336	-0.166775	-0.307812	-0.0257387	0.020466	-0.198374	-0.362496	-0.0342511	0.0178344	-0.140412	-0.4717	0.190877	0.406134	0.0639941	0.0323449	0.0956434	7.3989e-05
OI 5 min	Systolic blood pressure difference	mmHg	Quantitative	1666	527	-0.135407	-1.11485	0.844031	0.786415	Contemporary controls	-0.135407	-1.11485	0.844031	0.786415	NA	NA	NA	NA	0.0368398	-0.243376	0.317056	0.796654	0.319592	-0.677209	1.31639	0.529735	0.0440804	-1.17936	1.26752	0.943701	-0.403459	-2.97184	2.16492	0.758165	0.239928	0.0148631	0.464993	0.0366685
Taste	Taste pleasantness salty	Scale from 1 to 7	Quantitative	1693	552	0.0123023	-0.101405	0.12601	0.832061	Contemporary controls	0.0123023	-0.101405	0.12601	0.832061	NA	NA	NA	NA	-0.000709494	-0.0338432	0.0324242	0.966523	0.0165272	-0.101387	0.134441	0.783531	-0.0203635	-0.157505	0.116778	0.771027	-0.242465	-0.516613	0.0316832	0.0830097	0.00604318	-0.0203156	0.0324019	0.65317
Taste	Identification sweet		Binary	1694	552	0.971335	0.69675	1.24592	0.835254	Contemporary controls	0.971335	0.69675	1.24592	0.835254	NA	NA	NA	NA	0.943312	0.872468	1.01991	0.144259	0.83536	0.626426	1.11398	0.218246	0.755419	0.541195	1.05444	0.0995661	0.690941	0.350779	1.36097	0.296962	1.01288	0.950737	1.07908	0.690833
Taste	Identification salty		Binary	1693	552	1.0334	0.663931	1.40287	0.861931	Contemporary controls	1.0334	0.663931	1.40287	0.861931	NA	NA	NA	NA	1.04344	0.936166	1.16302	0.440268	1.16672	0.783383	1.73765	0.449642	1.06886	0.677066	1.68737	0.774825	1.77108	0.64774	4.84257	0.240118	0.978901	0.897271	1.06796	0.633674
Taste	Taste pleasantness bitter	Scale from 1 to 7	Quantitative	1684	551	0.00769624	-0.0842071	0.0995996	0.869624	Contemporary controls	0.00769624	-0.0842071	0.0995996	0.869624	NA	NA	NA	NA	-0.0117665	-0.0385936	0.0150605	0.389972	-0.0410216	-0.136525	0.0544821	0.399857	-0.0212097	-0.135772	0.0933531	0.716705	-0.182463	-0.42045	0.0555251	0.132914	-0.0119806	-0.0334156	0.00945451	0.273302
OI 5 min	Postural orthostatic tachycardia syndrome		Binary	1666	527	1.01546	0.694963	1.33595	0.925211	Contemporary controls	1.01546	0.694963	1.33595	0.925211	NA	NA	NA	NA	0.913515	0.830666	1.00463	0.0596906	0.751435	0.553349	1.02043	0.0675378	0.712804	0.485782	1.04592	0.0805435	0.327398	0.0749311	1.43051	0.086812	0.992185	0.927237	1.06168	0.81997
Hearing	Hearing impairment at 1 kHz		Binary	1695	1495	0.993754	0.717157	1.27035	0.964587	All controls after 2019	0.967581	0.57011	1.36505	0.871146	1.0768	0.660706	1.4929	0.728163	1.10087	0.989865	1.22432	0.0769857	1.42961	0.91373	2.23676	0.111532	1.40997	0.860977	2.30902	0.169853	1.82973	0.867332	3.86001	0.119982	1.01599	0.921484	1.12018	0.751249
Smell	Identification licorice		Binary	1642	13856	0.997993	0.887796	1.10819	0.97149	All controls	0.772961	0.570236	0.975686	0.0123381	1.34277	1.15882	1.52671	0.00156283	1.00569	0.948951	1.06582	0.848109	1.06492	0.865815	1.30982	0.551406	1.04675	0.818502	1.33864	0.71572	0.694344	0.412808	1.16789	0.166899	1.01636	0.970465	1.06443	0.490636
Hearing	Hearing impairment at 8 kHz		Binary	1695	1495	0.997179	0.812576	1.18178	0.976071	All controls after 2019	0.998908	0.752569	1.24525	0.993061	1.02215	0.739197	1.3051	0.879355	1.02576	0.954758	1.10205	0.487003	1.02676	0.792729	1.32988	0.841404	0.99414	0.737741	1.33965	0.969195	1.14296	0.616686	2.11834	0.670607	1.02408	0.965548	1.08617	0.4288
Taste	Hypogeusia		Binary	1692	552	1.00378	0.643841	1.36372	0.983597	Contemporary controls	1.00378	0.643841	1.36372	0.983597	NA	NA	NA	NA	1.00903	0.909397	1.11957	0.865589	1.05579	0.713948	1.5613	0.785317	1.12931	0.722328	1.76561	0.593987	0.826329	0.338296	2.01841	0.670885	0.942644	0.861054	1.03197	0.191506
Hearing	Hearing impairment at 4 kHz		Binary	1695	1495	1.0009	0.809497	1.1923	0.992644	All controls after 2019	0.882242	0.620775	1.14371	0.348493	1.23083	0.944965	1.5167	0.153552	0.974085	0.902145	1.05176	0.502168	0.979955	0.73847	1.30041	0.888451	0.864702	0.624483	1.19733	0.380555	1.00997	0.537968	1.89611	0.975363	1.01714	0.953927	1.08455	0.604238

## Sheet: S5b Physiological tests adj
Table S5b. Physiological test measures adjusted for comorbidities. The associations of SARS-CoV-2 status, the severity scale, severity categories and time since diagnosis with physiological measures. The association of SARS-CoV-2 status was performed separately using all available controls and only using contemporary controls. Furthermore, historic controls were compared to contemporary controls.…
						SARS-CoV-2 cases vs controls					SARS-CoV-2 cases vs contemporary controls				Contemporary controls vs historic controls				Severity Scale				Severity category 1 vs 2-4				Severity category 1 vs 3-4				Severity category 1 vs 4				Time since SARS-CoV-2 diagnosis
Test	Trait	Unit	Type of trait	N cases	N controls	Effect	CI lower	CI upper	P-value	Controls used	Effect	CI lower	CI upper	P-value	Effect	CI lower	CI upper	P-value	Effect	CI lower	CI upper	P-value	Effect	CI lower	CI upper	P-value	Effect	CI lower	CI upper	P-value	Effect	CI lower	CI upper	P-value	Effect	CI lower	CI upper	P-value
Smell	Partial anosmia		Binary	1572	13978	3.90254	3.63389	4.17119	3.88471e-19	All controls	4.29381	3.50885	5.07877	1.1459e-05	0.9735	0.207258	1.73974	0.945017	1.1243	0.984093	1.28449	0.0857406	1.79708	1.06112	3.04349	0.35113	1.91373	1.06813	3.42873	0.812734	2.04226	0.725935	5.74547	0.579564	0.92147	0.819912	1.03561	0.157106
Smell	Odor intensity lemon	Scale from 0 to 7	Quantitative	1572	13976	-0.251938	-0.315359	-0.188517	6.91207e-15	All controls	-0.318654	-0.447382	-0.189927	1.22342e-06	0.0717987	-0.0316459	0.175243	0.173705	-0.00175505	-0.0407286	0.0372185	0.929668	-0.0375991	-0.175248	0.10005	0.592388	-0.0548402	-0.21844	0.10876	0.511175	0.144265	-0.197239	0.485769	0.407681	0.072069	0.0414745	0.102663	3.8929e-06
Smell	Hyposmia lemon		Binary	1572	13978	2.04506	1.86775	2.22237	8.10744e-14	All controls	2.68155	2.24013	3.12297	1.21264e-06	0.731269	0.311027	1.15151	0.127593	1.04587	0.954742	1.14569	0.336089	1.25967	0.894713	1.77351	0.999994	1.31003	0.88947	1.92943	NA	0.846276	0.389892	1.83687	0.907728	0.794222	0.722293	0.873314	2.51829e-07
Smell	Hyposmia		Binary	1572	13978	1.89922	1.73651	2.06194	2.04043e-13	All controls	2.87848	2.46156	3.2954	2.92238e-08	0.651404	0.257105	1.0457	0.0236625	1.08077	0.992664	1.1767	0.0743326	1.52227	1.10949	2.08863	0.0512139	1.63549	1.1413	2.34368	0.0660535	1.53393	0.75072	3.13423	0.0570701	0.820146	0.754218	0.891836	6.33503e-07
Smell	Hyposmia cinnamon		Binary	1572	13978	1.75086	1.58567	1.91605	2.00683e-10	All controls	2.41317	2.02162	2.80473	1.66048e-06	0.71548	0.347303	1.08366	0.0626722	1.09314	1.00378	1.19045	0.0412809	1.32749	0.96497	1.8262	0.382862	1.47986	1.03411	2.11774	0.547803	1.40635	0.734451	2.69294	0.879493	0.882353	0.814538	0.955814	0.0013702
Smell	Odor pleasantness lemon	Scale from 1 to 7	Quantitative	1548	13884	-0.167899	-0.226172	-0.109627	1.62983e-08	All controls	-0.111431	-0.217568	-0.0052948	0.0396115	-0.061485	-0.157403	0.0344327	0.208972	-0.0234728	-0.0550712	0.00812572	0.145399	-0.0314183	-0.143161	0.0803245	0.581575	-0.0854073	-0.220953	0.0501389	0.216834	-0.187016	-0.465744	0.091711	0.188479	0.00122284	-0.0236682	0.0261139	0.92329
Smell	Hyposmia licorice		Binary	1572	13978	1.65582	1.48437	1.82727	3.25527e-08	All controls	4.21845	3.70633	4.73057	6.68756e-11	0.385015	-0.105371	0.875401	1.04219e-05	1.04061	0.951271	1.13835	0.38571	1.42883	1.01715	2.00713	0.0966396	1.43409	0.973523	2.11255	0.0662027	1.27099	0.621677	2.59849	0.107213	0.808341	0.737768	0.885665	8.69977e-07
Smell	Identification lemon		Binary	1548	13884	0.722674	0.605874	0.839474	3.6594e-08	All controls	0.783112	0.574511	0.991713	0.0219806	0.943719	0.756484	1.13095	0.543672	1.03489	0.971446	1.10247	0.288225	1.11737	0.897985	1.39035	0.92946	1.13289	0.87184	1.47211	0.550576	0.948503	0.530024	1.69739	0.389213	1.02872	0.979991	1.07988	0.253465
Smell	Identification banana		Binary	1559	13925	0.740069	0.613423	0.866715	2.09538e-06	All controls	0.790778	0.562383	1.01917	0.0455561	0.952312	0.752281	1.15234	0.631047	1.04052	0.970155	1.11598	0.26698	1.28362	1.00406	1.64101	0.992714	1.22905	0.915964	1.64916	0.965122	1.46739	0.784668	2.74413	0.999964	0.988352	0.936012	1.04362	0.672203
Smell	Identification peppermint		Binary	1565	13931	0.750225	0.628603	0.871848	4.9442e-06	All controls	0.777887	0.544222	1.01155	0.0331107	0.978386	0.767049	1.18972	0.839661	1.10616	1.03404	1.18331	0.00309045	1.15676	0.920348	1.45391	0.255847	1.44993	1.09119	1.92661	0.996617	1.69705	0.937386	3.07237	0.918434	1.02024	0.968367	1.07489	0.449882
Smell	Odor pleasantness fish	Scale from 1 to 7	Quantitative	1561	13873	-0.161882	-0.231528	-0.0922362	5.21998e-06	All controls	-0.149225	-0.268326	-0.0301247	0.014059	-0.0337571	-0.149849	0.0823347	0.568727	-0.0471883	-0.0818257	-0.0125508	0.00758054	-0.178317	-0.300488	-0.0561461	0.00422634	-0.232111	-0.381302	-0.0829199	0.0022933	0.00836257	-0.31973	0.336455	0.960156	-0.00521399	-0.0325289	0.0221009	0.708305
Smell	Identification score	Scale from 0 to 12	Quantitative	1493	13657	-0.301124	-0.435308	-0.16694	1.09017e-05	All controls	-0.56353	-0.811497	-0.315562	8.41704e-06	0.307826	0.0896852	0.525968	0.00567795	0.0226054	-0.0509714	0.0961822	0.547053	0.177954	-0.0810024	0.436911	0.17801	0.0812573	-0.234692	0.397207	0.614204	-0.122896	-0.771858	0.526065	0.710508	0.0423958	-0.0160316	0.100823	0.154967
Taste	Partial ageusia		Binary	1579	519	3.22649	2.61734	3.83565	1.51317e-05	Contemporary controls	3.22649	2.61734	3.83565	1.51317e-05	NA	NA	NA	NA	1.12806	1.00644	1.26437	0.0388269	1.64914	1.04847	2.59393	0.96136	2.05669	1.26079	3.355	NA	1.56558	0.635723	3.85551	0.453998	0.969985	0.879842	1.06936	0.535923
Smell	Odor pleasantness cinnamon	Scale from 1 to 7	Quantitative	1539	13797	0.13157	0.0699904	0.193149	2.81775e-05	All controls	-0.157354	-0.26752	-0.0471889	0.00511724	0.30478	0.20339	0.40617	3.82061e-09	-0.00265025	-0.0360615	0.030761	0.87645	0.00430621	-0.113337	0.12195	0.942806	-0.0507755	-0.192151	0.0906001	0.48147	-0.239399	-0.534873	0.0560748	0.112279	0.0115099	-0.0147848	0.0378046	0.390921
Smell	Identification fish		Binary	1561	13873	0.799099	0.687016	0.911181	9.96173e-05	All controls	0.830023	0.616635	1.04341	0.0852952	0.964036	0.774467	1.15361	0.705473	0.943147	0.886969	1.00288	0.0619092	0.88171	0.71071	1.09385	0.670458	0.798792	0.620357	1.02855	0.813387	0.905152	0.540981	1.51447	0.0476477	1.01727	0.968821	1.06815	0.490526
Smell	Hyposmia peppermint		Binary	1572	13978	1.83415	1.53934	2.12896	0.000151288	All controls	2.046	1.36031	2.73168	0.0275899	0.943009	0.299507	1.58651	0.856967	0.907061	0.774635	1.06213	0.220544	0.644262	0.372848	1.11325	0.0239466	0.714664	0.381438	1.339	0.0399374	0.478956	0.131946	1.73858	0.554856	0.876889	0.757406	1.01522	0.064759
Vital signs	Heart rate	Beats per min	Quantitative	1584	14306	-1.14789	-1.74977	-0.546001	0.000185475	All controls	0.962036	-0.17544	2.09951	0.0973787	-2.28753	-3.29135	-1.28372	7.94952e-06	-0.246849	-0.58101	0.0873122	0.147652	-0.833523	-2.0136	0.346553	0.166234	-1.29595	-2.71824	0.126337	0.0741156	-1.13397	-4.23494	1.967	0.473535	-0.1504	-0.412139	0.11134	0.260062
Grip strength	Grip strength	kg	Quantitative	1584	8063	-0.746164	-1.14958	-0.342751	0.000288662	All controls after 2017	-0.603316	-1.35428	0.14765	0.11534	-0.120513	-0.769638	0.528611	0.715944	-0.201378	-0.421332	0.0185752	0.072737	-0.337486	-1.11338	0.438404	0.393918	-0.268243	-1.19356	0.657077	0.569907	-1.97533	-3.99532	0.0446584	0.0552801	0.114131	-0.0582037	0.286465	0.194275
Smell	Odor pleasantness peppermint	Scale from 1 to 7	Quantitative	1565	13931	-0.0942834	-0.145936	-0.0426305	0.000346714	All controls	-0.144456	-0.241771	-0.0471405	0.00362072	0.0573683	-0.0279093	0.142646	0.187323	-0.00556826	-0.0345053	0.0233688	0.706057	-0.0290717	-0.131188	0.0730444	0.576846	-0.0473919	-0.169548	0.0747639	0.447011	-0.148002	-0.404035	0.108031	0.257216	0.00892762	-0.0137184	0.0315737	0.439712
Sleep	Heart rate	Beats per min	Quantitative	405	2658	1.88916	0.840211	2.93811	0.000415618	All controls	2.70582	0.382486	5.02916	0.0224498	-0.719487	-2.63709	1.19812	0.462099	0.190667	-0.367144	0.748478	0.502887	1.54344	-0.499999	3.58688	0.138762	1.04071	-1.24163	3.32305	0.371469	-1.13495	-6.22436	3.95446	0.66205	0.628589	-0.00752591	1.2647	0.0527684
DXA	LMI	kg/m2	Quantitative	1572	14157	-0.146028	-0.228488	-0.0635672	0.00051866	All controls	-0.0794629	-0.233121	0.0741948	0.310774	-0.0518228	-0.188643	0.0849972	0.457856	-0.00613167	-0.0511996	0.0389362	0.789727	0.0270273	-0.132355	0.18641	0.739612	0.0152525	-0.171365	0.20187	0.872729	0.023491	-0.370415	0.417397	0.90695	0.0316463	-0.00353646	0.0668291	0.0779027
Smell	Hyposmia fish		Binary	1572	13978	1.65664	1.38193	1.93135	0.00063311	All controls	3.81999	2.97412	4.66587	0.000220283	0.424707	-0.389938	1.23935	0.0179041	1.02308	0.885833	1.1816	0.756525	1.39285	0.798931	2.42828	0.838429	1.49088	0.801747	2.77236	0.970376	0.928936	0.280556	3.07576	0.442246	0.871575	0.757404	1.00296	0.0434154
Grip strength	Grip strength women	kg	Quantitative	806	4589	-0.729525	-1.16537	-0.293676	0.00103567	All controls after 2017	-0.473386	-1.2983	0.351529	0.260688	-0.141815	-0.860048	0.576418	0.698756	-0.289866	-0.530612	-0.0491202	0.0182796	-0.961057	-1.80503	-0.117089	0.0256201	-0.903424	-1.89592	0.0890752	0.0744085	-2.78185	-5.2111	-0.352605	0.0248006	0.0267516	-0.167711	0.221214	0.787444
Smell	Odor pleasantness scale	Scale from 6 to 42	Quantitative	1493	13657	-0.340911	-0.548873	-0.132949	0.00131346	All controls	-0.65152	-1.03973	-0.263313	0.0010039	0.312044	-0.0250766	0.649165	0.069646	-0.0755287	-0.193523	0.0424661	0.209624	-0.120403	-0.536073	0.295267	0.570217	-0.42424	-0.926946	0.0784664	0.0981138	-0.628135	-1.6991	0.442827	0.250322	0.0258022	-0.0679001	0.119504	0.589396
Smell	Hyposmia banana		Binary	1572	13978	1.45426	1.22323	1.68528	0.00223068	All controls	2.59666	2.0018	3.19152	0.000485914	0.553972	-0.00598227	1.11393	0.0237925	1.02764	0.911231	1.15891	0.657242	1.31451	0.829498	2.0831	0.0479514	1.30582	0.774742	2.20094	0.10248	1.05589	0.412576	2.70231	0.3035	0.8487	0.751562	0.958393	0.00499289
Spirometry	FVC	%	Quantitative	1463	12891	1.0186	0.351426	1.68578	0.0027679	All controls	0.0714509	-1.07438	1.21728	0.902725	1.01146	-0.113558	2.13647	0.0780424	-0.0735943	-0.401355	0.254166	0.65987	0.410358	-0.73857	1.55929	0.483899	0.0729439	-1.32543	1.47132	0.918566	0.265056	-2.75111	3.28122	0.863247	0.252401	-0.00618915	0.510991	0.0557367
BMI	Obesity		Binary	1572	14157	1.1851	1.06936	1.30085	0.00426285	All controls	1.19722	0.973021	1.42141	0.113511	1.01107	0.816523	1.20562	0.911707	1.13388	1.06399	1.20836	0.00010722	1.33587	1.06041	1.68288	0.0136825	1.48762	1.13317	1.95293	0.00431698	2.5063	1.44427	4.34927	0.00109364	1.0382	0.98703	1.09202	0.14748
Smell	Odor intensity scale	Scale from 0 to 42	Quantitative	1572	13978	-0.356475	-0.605434	-0.107517	0.00500898	All controls	-1.36886	-1.8969	-0.840821	3.75443e-07	1.09759	0.695837	1.49935	8.56947e-08	-0.0989444	-0.262474	0.0645848	0.235657	-0.437615	-1.01508	0.139849	0.137456	-0.665795	-1.34161	0.0100236	0.0534917	0.156555	-1.22505	1.53816	0.82424	0.291709	0.164422	0.418995	7.06136e-06
Smell	Odor intensity cinnamon	Scale from 0 to 7	Quantitative	1572	13978	-0.0831904	-0.146296	-0.0200844	0.0097719	All controls	-0.286753	-0.418106	-0.155399	1.87906e-05	0.219054	0.116623	0.321485	2.77057e-05	-0.0354038	-0.0758132	0.00500571	0.0859416	-0.109989	-0.252753	0.0327753	0.131036	-0.178187	-0.350087	-0.00628709	0.0421855	0.0191295	-0.330941	0.3692	0.914707	0.0581469	0.026674	0.0896198	0.000293305
Smell	Identification cinnamon		Binary	1539	13797	1.14749	1.03473	1.26024	0.0170674	All controls	0.819959	0.614721	1.0252	0.0580544	1.44112	1.25768	1.62455	0.000101591	0.9891	0.930195	1.05174	0.726422	1.02157	0.826464	1.26274	0.925978	0.978219	0.759677	1.25963	0.991772	0.683706	0.391234	1.19482	0.912217	1.00422	0.957386	1.05335	0.862734
Taste	Taste pleasantness sweet	Scale from 1 to 7	Quantitative	1481	507	0.10544	0.0163092	0.194571	0.0204145	Contemporary controls	0.10544	0.0163092	0.194571	0.0204145	NA	NA	NA	NA	0.00475604	-0.0223421	0.0318542	0.730844	-0.0422675	-0.137021	0.0524861	0.381948	-0.0286753	-0.144344	0.0869931	0.627036	0.0718263	-0.178101	0.321754	0.573244	0.0182981	-0.00279011	0.0393863	0.0890033
Taste	Taste intensity sweet	Scale from 0 to 7	Quantitative	1579	519	-0.146998	-0.276605	-0.0173903	0.0262167	Contemporary controls	-0.146998	-0.276605	-0.0173903	0.0262167	NA	NA	NA	NA	-0.0490275	-0.0884272	-0.00962787	0.0147298	-0.15931	-0.298524	-0.0200971	0.0249001	-0.250264	-0.418274	-0.0822542	0.00350507	-0.135548	-0.489231	0.218136	0.452555	0.0524118	0.0218382	0.0829854	0.000779452
Spirometry	FEV1	%	Quantitative	1463	12891	0.842028	0.0940315	1.59002	0.0273564	All controls	-0.810052	-2.03661	0.416501	0.195513	1.80103	0.535846	3.06621	0.00526878	-0.0432057	-0.398668	0.312257	0.8117	0.709934	-0.535716	1.95558	0.263967	0.399866	-1.08602	1.88576	0.597879	0.201451	-2.90596	3.30886	0.898889	0.138776	-0.140795	0.418346	0.330592
Smell	Odor intensity peppermint	Scale from 0 to 7	Quantitative	1572	13978	-0.0587424	-0.111573	-0.0059118	0.0293075	All controls	-0.132967	-0.237582	-0.0283521	0.0127317	0.0802566	-0.0063168	0.16683	0.0692188	-0.000130091	-0.031783	0.0315228	0.993573	-0.000656602	-0.11246	0.111147	0.990816	-0.0147385	-0.150668	0.121191	0.831703	0.189188	-0.0865876	0.464964	0.178753	0.0303485	0.0055037	0.0551932	0.0166573
Smell	Odor pleasantness licorice	Scale from 1 to 7	Quantitative	1531	13811	-0.0627824	-0.119378	-0.00618736	0.0296841	All controls	-0.0508875	-0.159321	0.0575455	0.357664	-0.00383715	-0.0961965	0.0885222	0.9351	-0.0137517	-0.0463723	0.018869	0.408654	0.0198231	-0.0951678	0.134814	0.735453	-0.0522525	-0.191169	0.0866638	0.460975	-0.101181	-0.400842	0.19848	0.508102	0.0229556	-0.00262172	0.0485329	0.0785611
Grip strength	Grip strength men	kg	Quantitative	778	3474	-0.740109	-1.44805	-0.0321662	0.0404567	All controls after 2017	-0.610046	-1.8548	0.634712	0.336763	-0.244347	-1.36641	0.877711	0.669508	-0.0924671	-0.461738	0.276804	0.623573	0.291476	-1.01141	1.59436	0.661037	0.479169	-1.12022	2.07856	0.557066	-0.922731	-4.03629	2.19083	0.561333	0.170165	-0.110516	0.450846	0.23473
CPET	VO2 max	(mL/min)/kg	Quantitative	1383	7945	-0.338884	-0.665156	-0.0126128	0.0417736	All controls	-0.800875	-1.44085	-0.160903	0.0141753	0.582479	0.0493746	1.11558	0.0322314	-0.241479	-0.425638	-0.0573205	0.010168	-0.669639	-1.30555	-0.0337323	0.0390206	-0.953282	-1.73495	-0.171612	0.0168342	-1.4385	-3.31799	0.440986	0.133582	-0.145368	-0.288925	-0.0018098	0.0471768
BMI	BMI	kg/m2	Quantitative	1572	14157	-0.166302	-0.336489	0.00388469	0.0554592	All controls	-0.147618	-0.460826	0.165591	0.355608	-0.0100052	-0.292857	0.272847	0.944727	0.0602844	-0.0319723	0.152541	0.200283	0.197746	-0.128548	0.524039	0.2349	0.323668	-0.0587271	0.706062	0.0971181	0.559106	-0.234315	1.35253	0.167227	0.0285452	-0.043538	0.100628	0.43765
Vital signs	Systolic blood pressure	mmHg	Quantitative	1579	14294	0.746542	-0.0202287	1.51331	0.0563535	All controls	3.10615	1.75133	4.46098	7.00239e-06	-2.57119	-3.85941	-1.28296	9.1537e-05	-0.628034	-1.02915	-0.226915	0.00214935	-1.17643	-2.59513	0.242273	0.104101	-2.29477	-4.00475	-0.584793	0.00853104	-3.59328	-7.18083	-0.00572034	0.0496316	-0.0857098	-0.39884	0.227421	0.59162
Taste	Taste intensity scale	Scale from 0 to 28	Quantitative	1577	519	-0.251593	-0.562355	0.0591685	0.112554	Contemporary controls	-0.251593	-0.562355	0.0591685	0.112554	NA	NA	NA	NA	-0.104688	-0.199815	-0.00956176	0.0310047	-0.289917	-0.625776	0.0459423	0.0906668	-0.57132	-0.982213	-0.160427	0.00642526	-0.420162	-1.27842	0.4381	0.337298	0.118703	0.0448247	0.192581	0.00163712
Hearing	Hearing impairment at 0.5 kHz		Binary	1584	1463	1.32728	0.977488	1.67707	0.113036	All controls after 2019	1.29078	0.770569	1.81099	0.326833	1.22321	0.659296	1.78712	0.488003	1.14842	1.00288	1.31509	0.0453454	1.20063	0.707689	2.03692	0.312023	1.38711	0.783001	2.4573	0.569122	1.61584	0.665871	3.92108	0.95247	1.04857	0.93493	1.17602	0.424461
OI 5 min	Heart rate difference	Beats per min	Quantitative	1549	499	0.729467	-0.329229	1.78816	0.17686	Contemporary controls	0.729467	-0.329229	1.78816	0.17686	NA	NA	NA	NA	-0.0468929	-0.332477	0.238691	0.74758	0.0594489	-0.947768	1.06667	0.907902	0.0602513	-1.13156	1.25206	0.921069	-0.273501	-2.8644	2.3174	0.836087	0.0535005	-0.170525	0.277526	0.63973
DXA	FMI	kg/m2	Quantitative	1572	14157	-0.0798805	-0.203187	0.0434256	0.20418	All controls	-0.0930518	-0.316983	0.130879	0.415384	0.00685775	-0.198361	0.212076	0.947778	0.0719392	0.00593681	0.137942	0.0326551	0.186141	-0.04744	0.419721	0.118306	0.333312	0.0558065	0.610817	0.0185647	0.548947	-0.0241219	1.12202	0.0604498	0.00509916	-0.046605	0.0568033	0.846725
Vital signs	Diastolic blood pressure	mmHg	Quantitative	1579	14294	0.322593	-0.200985	0.846172	0.227194	All controls	1.28631	0.326361	2.24626	0.00863048	-0.963509	-1.83726	-0.0897613	0.030668	-0.217992	-0.502514	0.0665299	0.133177	0.0437405	-0.961115	1.0486	0.932009	-0.483532	-1.68433	0.717266	0.42997	-2.77405	-5.26352	-0.28458	0.0289582	0.214921	-0.00798476	0.437826	0.058786
Sleep	Heart rate variability		Quantitative	405	2658	4.89542	-3.61274	13.4036	0.259428	All controls	-1.56833	-19.691	16.5543	0.865311	8.13444	-7.50248	23.7714	0.307915	-0.400557	-4.71538	3.91426	0.85562	-3.08549	-18.9225	12.7515	0.702564	-4.31105	-22.244	13.6219	0.637511	-29.1756	-68.1796	9.82828	0.142617	-1.8889	-6.87124	3.09344	0.457437
Taste	Taste intensity bitter	Scale from 0 to 7	Quantitative	1579	519	-0.068761	-0.19597	0.0584484	0.289397	Contemporary controls	-0.068761	-0.19597	0.0584484	0.289397	NA	NA	NA	NA	-0.0119135	-0.0505067	0.0266798	0.545153	0.0233421	-0.112993	0.159677	0.737192	-0.107553	-0.27582	0.0607152	0.210285	0.0190284	-0.324112	0.362168	0.913449	0.0332031	0.00328478	0.0631214	0.0296158
Taste	Taste pleasantness scale	Scale from 4 to 28	Quantitative	1471	507	0.142119	-0.121266	0.405504	0.290243	Contemporary controls	0.142119	-0.121266	0.405504	0.290243	NA	NA	NA	NA	-0.0122531	-0.0924124	0.0679061	0.764478	-0.0701641	-0.350122	0.209794	0.623269	-0.0635334	-0.396884	0.269818	0.708734	0.00962641	-0.681593	0.700845	0.978223	0.00529803	-0.0571802	0.0677762	0.867996
Smell	Odor intensity banana	Scale from 0 to 7	Quantitative	1572	13978	0.0280048	-0.0306112	0.0866209	0.349055	All controls	-0.10448	-0.220653	0.0116917	0.0779438	0.146836	0.0508569	0.242814	0.0027126	-0.0112129	-0.0461061	0.0236803	0.528796	-0.0409915	-0.164239	0.0822562	0.514475	-0.069751	-0.214936	0.0754343	0.346378	0.0325075	-0.26656	0.331575	0.831292	0.0407197	0.0133538	0.0680855	0.00354062
Taste	Taste intensity salty	Scale from 0 to 7	Quantitative	1578	519	-0.0436041	-0.14397	0.0567622	0.39448	Contemporary controls	-0.0436041	-0.14397	0.0567622	0.39448	NA	NA	NA	NA	-0.0210389	-0.0512086	0.00913087	0.171686	-0.0640537	-0.170535	0.0424276	0.238384	-0.113848	-0.243283	0.0155874	0.0847142	-0.153628	-0.424078	0.116822	0.265548	0.0307846	0.00733473	0.0542345	0.0100805
Smell	Odor intensity fish	Scale from 0 to 7	Quantitative	1572	13975	0.026724	-0.0372458	0.0906938	0.412896	All controls	-0.11911	-0.244006	0.00578504	0.061593	0.162855	0.0579856	0.267725	0.00233656	-0.0141205	-0.0520496	0.0238087	0.465586	-0.0886116	-0.222534	0.0453109	0.194679	-0.132766	-0.293787	0.0282542	0.106077	-0.0693983	-0.38845	0.249653	0.669868	0.0263394	-0.0035307	0.0562095	0.08393
Taste	Identification sour		Binary	1577	519	0.808881	0.28948	1.32828	0.415982	Contemporary controls	0.808881	0.28948	1.32828	0.415982	NA	NA	NA	NA	1.03561	0.899169	1.19275	0.626382	0.970835	0.575416	1.63798	0.341621	0.939793	0.517765	1.70582	0.133608	1.08026	0.369023	3.16231	0.453142	1.09871	0.964075	1.25214	0.143875
Taste	Identification bitter		Binary	1579	519	1.15005	0.809393	1.49071	0.424995	Contemporary controls	1.15005	0.809393	1.49071	0.424995	NA	NA	NA	NA	1.02502	0.92392	1.13718	0.640188	1.15727	0.804262	1.66523	0.517455	1.04531	0.684672	1.59591	0.488391	0.643603	0.310678	1.33329	0.403635	1.09447	0.999158	1.19887	0.0447486
Hearing	PTA hearing impairment		Binary	1584	1463	1.08798	0.878265	1.29769	0.430369	All controls after 2019	1.03971	0.74354	1.33588	0.796393	1.08834	0.773004	1.40367	0.59898	0.998431	0.91724	1.08681	0.971059	1.04449	0.76331	1.42924	0.70212	1.05789	0.743194	1.50585	0.603806	0.907491	0.479322	1.71814	0.935933	1.06685	0.993297	1.14584	0.0780238
OI 5 min	Orthostatic hypotension		Binary	1583	513	1.14433	0.804149	1.4845	0.433046	Contemporary controls	1.14433	0.804149	1.4845	0.433046	NA	NA	NA	NA	1.00372	0.911764	1.10495	0.939635	0.922273	0.657373	1.29392	0.552056	0.999538	0.674554	1.48109	0.483821	1.29074	0.617918	2.69617	0.307352	0.983924	0.909345	1.06462	0.685355
Spirometry	FEV1/FVC ratio	Ratio	Quantitative	1463	12893	-0.00131585	-0.00486939	0.00223768	0.467976	All controls	-0.00689069	-0.0125687	-0.00121263	0.0173792	0.00616611	0.000161931	0.0121703	0.0441293	0.000379736	-0.00131867	0.00207814	0.661224	0.00187623	-0.00407756	0.00783002	0.5368	0.00262789	-0.00462911	0.00988489	0.477858	0.00356102	-0.0121498	0.0192718	0.656859	-0.000921338	-0.0022643	0.000421619	0.178735
CPET	Load	W	Quantitative	1384	7968	0.856275	-1.46593	3.17848	0.469854	All controls	-5.37051	-10.0994	-0.641602	0.0260192	7.34705	3.61092	11.0832	0.000116053	-1.70529	-3.06836	-0.342207	0.0142038	-4.07054	-8.77908	0.637991	0.0901843	-5.35119	-11.0218	0.319406	0.0643713	-16.1865	-29.7321	-2.64098	0.0191734	-0.798625	-1.8634	0.266149	0.14154
Taste	Taste pleasantness sour	Scale from 1 to 7	Quantitative	1576	519	0.0486265	-0.088021	0.185274	0.485507	Contemporary controls	0.0486265	-0.088021	0.185274	0.485507	NA	NA	NA	NA	-0.0167273	-0.0575664	0.0241119	0.422094	-0.057016	-0.201124	0.0870916	0.438061	-0.0488806	-0.221936	0.124175	0.579843	0.112686	-0.248962	0.474334	0.541388	-0.0242699	-0.0561454	0.0076056	0.135611
Hearing	Hearing impairment at 6 kHz		Binary	1584	1463	0.937738	0.757021	1.11845	0.485932	All controls after 2019	0.903717	0.657271	1.15016	0.421152	1.07495	0.803859	1.34604	0.60094	1.04338	0.968913	1.12358	0.260868	1.36608	1.05061	1.77626	NA	1.23914	0.911011	1.68545	0.386928	0.973742	0.527468	1.7976	0.580697	0.988518	0.930993	1.0496	0.705408
Taste	Identification salty		Binary	1578	519	1.12311	0.74363	1.5026	0.551582	Contemporary controls	1.12311	0.74363	1.5026	0.551582	NA	NA	NA	NA	1.05788	0.940876	1.18944	0.344191	1.14231	0.751595	1.73613	0.980404	1.07932	0.66655	1.74771	0.989571	1.68936	0.610194	4.67711	0.984977	1.00313	0.913004	1.10216	0.947993
Smell	Odor intensity licorice	Scale from 0 to 7	Quantitative	1572	13978	-0.0182933	-0.0833771	0.0467906	0.581701	All controls	-0.406894	-0.542882	-0.270906	4.50251e-09	0.415535	0.310266	0.520805	1.01948e-14	-0.0363221	-0.0782	0.00555575	0.0891355	-0.159767	-0.307611	-0.0119233	0.0341691	-0.215512	-0.389901	-0.0411228	0.0154273	-0.159137	-0.515819	0.197545	0.381862	0.0640853	0.0311956	0.0969749	0.000133966
OI 5 min	Systolic blood pressure difference	mmHg	Quantitative	1549	499	-0.257137	-1.26357	0.749291	0.616533	Contemporary controls	-0.257137	-1.26357	0.749291	0.616533	NA	NA	NA	NA	-0.10861	-0.401503	0.184283	0.467347	-0.0397309	-1.07287	0.993411	0.939917	-0.444516	-1.72562	0.836585	0.496453	-1.18623	-3.92069	1.54822	0.395177	0.237053	0.00342661	0.470678	0.0467291
Smell	Odor pleasantness banana	Scale from 1 to 7	Quantitative	1559	13925	-0.0143078	-0.0733013	0.0446858	0.634529	All controls	-0.0883398	-0.199056	0.022376	0.117846	0.0716351	-0.0254382	0.168708	0.148071	0.00900219	-0.0242018	0.0422062	0.595148	0.0334749	-0.083812	0.150762	0.575885	0.0167155	-0.123708	0.157139	0.81552	-0.0659806	-0.355377	0.223416	0.65497	0.000948419	-0.025126	0.0270229	0.943165
Hearing	Hearing impairment at 2 kHz		Binary	1584	1463	1.04497	0.806916	1.28303	0.717207	All controls after 2019	1.04971	0.70235	1.39707	0.783821	0.996714	0.637886	1.35554	0.985654	1.04037	0.945024	1.14534	0.420204	1.09925	0.758739	1.59258	0.864268	1.10628	0.732721	1.6703	0.781251	1.40746	0.727996	2.72109	0.952835	1.00448	0.921554	1.09488	0.919022
Hearing	Hearing impairment at 1 kHz		Binary	1584	1463	1.04974	0.766644	1.33284	0.736906	All controls after 2019	1.01372	0.60265	1.4248	0.94814	1.08968	0.662499	1.51685	0.694513	1.10106	0.983593	1.23256	0.0947871	1.48923	0.940922	2.35707	0.648634	1.50017	0.907234	2.48062	0.721803	1.93105	0.906871	4.11191	0.84137	1.00129	0.904594	1.10833	0.9801
Hearing	Hearing impairment at 8 kHz		Binary	1584	1463	1.02926	0.839093	1.21943	0.7662	All controls after 2019	1.01735	0.762221	1.27248	0.894839	1.04193	0.752157	1.33171	0.781008	1.0222	0.947403	1.1029	0.571213	1.02997	0.787841	1.34652	0.486649	0.987768	0.724589	1.34654	0.194606	1.23296	0.649962	2.33891	0.153128	1.02919	0.96784	1.09443	0.359952
Taste	Identification sweet		Binary	1579	519	0.960664	0.675518	1.24581	0.782166	Contemporary controls	0.960664	0.675518	1.24581	0.782166	NA	NA	NA	NA	0.983187	0.904902	1.06824	0.689082	0.874882	0.651162	1.17547	0.0161504	0.808045	0.572932	1.13964	0.027137	0.773488	0.38411	1.55758	0.0499017	1.0262	0.959984	1.09698	0.443684
Vital signs	SpO2	%	Quantitative	1578	14133	-0.0141811	-0.133035	0.104672	0.815094	Contemporary controls	-0.0141811	-0.133035	0.104672	0.815094	NA	NA	NA	NA	-0.0246139	-0.0600336	0.0108059	0.173185	-0.0559757	-0.181016	0.0690647	0.380261	-0.107293	-0.265045	0.0504601	0.182513	-0.174671	-0.473888	0.124546	0.252552	-0.0170806	-0.0448324	0.0106711	0.227687
OI 5 min	Postural orthostatic tachycardia syndrome		Binary	1549	499	1.03147	0.701305	1.36163	0.853844	Contemporary controls	1.03147	0.701305	1.36163	0.853844	NA	NA	NA	NA	0.904799	0.81827	1.00048	0.0487604	0.705656	0.514835	0.967204	0.248804	0.679402	0.457934	1.00798	0.0993871	0.326185	0.0742061	1.4338	0.0503528	0.999348	0.931843	1.07174	0.985419
Taste	Taste pleasantness salty	Scale from 1 to 7	Quantitative	1578	519	0.0094683	-0.10735	0.126286	0.873778	Contemporary controls	0.0094683	-0.10735	0.126286	0.873778	NA	NA	NA	NA	0.00608208	-0.0287359	0.0409001	0.732067	0.0442454	-0.0786073	0.167098	0.480254	0.00653759	-0.137708	0.150783	0.929215	-0.104695	-0.398484	0.189093	0.484882	0.00624424	-0.0209716	0.0334601	0.652933
Taste	Taste intensity sour	Scale from 0 to 7	Quantitative	1577	519	0.00568901	-0.0881657	0.0995437	0.905429	Contemporary controls	0.00568901	-0.0881657	0.0995437	0.905429	NA	NA	NA	NA	-0.0231459	-0.0514155	0.00512373	0.108547	-0.0921864	-0.191916	0.00754316	0.0700243	-0.103603	-0.221962	0.0147565	0.0862285	-0.139335	-0.390545	0.111874	0.27698	0.0036349	-0.0185229	0.0257927	0.747809
OI 5 min	Diastolic blood pressure difference	mmHg	Quantitative	1549	499	0.0412974	-0.782172	0.864767	0.921698	Contemporary controls	0.0412974	-0.782172	0.864767	0.921698	NA	NA	NA	NA	0.0204116	-0.226331	0.267154	0.871196	0.368991	-0.501018	1.239	0.405815	0.302862	-0.756692	1.36242	0.575312	-2.72945	-4.97801	-0.480886	0.0173515	-0.0519341	-0.246491	0.142623	0.60084
Taste	Hypogeusia		Binary	1577	519	0.985185	0.610105	1.36027	0.937895	Contemporary controls	0.985185	0.610105	1.36027	0.937895	NA	NA	NA	NA	0.960615	0.859345	1.07382	0.478067	0.969539	0.64938	1.44754	0.200481	1.02411	0.646301	1.62277	0.319839	0.830942	0.33899	2.03683	0.503809	0.904077	0.81848	0.998627	0.039324
Taste	Taste pleasantness bitter	Scale from 1 to 7	Quantitative	1571	519	-0.0027363	-0.0968684	0.0913958	0.954565	Contemporary controls	-0.0027363	-0.0968684	0.0913958	0.954565	NA	NA	NA	NA	-0.00331251	-0.0315166	0.0248916	0.817938	-0.019764	-0.119333	0.079805	0.697238	0.00892116	-0.112124	0.129966	0.885142	-0.110683	-0.365394	0.144027	0.394376	-0.0110835	-0.0331419	0.010975	0.324713
Smell	Identification licorice		Binary	1531	13811	1.00178	0.88806	1.1155	0.97556	All controls	0.766127	0.55609	0.976165	0.0124517	1.35219	1.1631	1.54129	0.001626	1.00686	0.94707	1.07041	0.826823	1.0674	0.862354	1.3212	0.630912	1.07208	0.832005	1.38144	0.247907	0.728918	0.430275	1.23484	0.0193281	1.00907	0.96169	1.05878	0.712738
Hearing	Hearing impairment at 4 kHz		Binary	1584	1463	0.999611	0.802819	1.1964	0.996911	All controls after 2019	0.852766	0.58316	1.12237	0.24793	1.28165	0.989134	1.57417	0.0955069	0.962825	0.887277	1.04481	0.363001	0.990075	0.739587	1.3254	0.455791	0.890095	0.636553	1.24462	0.757865	1.01802	0.535696	1.93463	0.634181	1.00499	0.939584	1.07495	0.884781

## Sheet: S6 Longitud. physiol. measures
Table S6. Comparing physiological test measures for individuals that participated in the deCODE health study both before and during the pandemic. Hyposmia and partial anosmia are binary traits and the difference between pandemic and pre-pandemic measurements are regressed against covid status in a linear model, adjusting for age, sex and time between measures. All other traits displayed in the ta…
		The effect of SARS-CoV-2 status on the difference between pandemic and pre-pandemic measurements, adjusting for age, sex and time between measures (linear regression)
Test	Measure	N	Effect	CI lower	CI upper	P-value
Smell	Odor intensity scale	406	-2.38492	-3.45681	-1.31303	1.29507e-05
Smell	Odor intensity cinnamon	406	-0.587027	-0.881259	-0.292795	9.21312e-05
Smell	Odor intensity licorice	406	-0.589564	-0.907052	-0.272076	0.000273009
Smell	Odor intensity lemon	406	-0.578988	-0.906842	-0.251134	0.000537488
Smell	Hyposmia	406	0.121876	0.0421789	0.201572	0.00272367
Smell	Partial anosmia	406	0.0643107	0.0167121	0.111909	0.00809305
Smell	Odor intensity banana	406	-0.329502	-0.629735	-0.0292689	0.0314703
Smell	Odor intensity peppermint	406	-0.266126	-0.509434	-0.0228181	0.0320478
Smell	Odor pleasantness lemon	406	-0.24667	-0.534073	0.0407321	0.0925264
Smell	Odor pleasantness cinnamon	405	-0.213288	-0.47795	0.0513727	0.11421
Smell	Odor pleasantness licorice	406	-0.180598	-0.435162	0.0739653	0.164375
Spirometry	FEV1	391	-0.792483	-1.91105	0.32608	0.164946
Smell	Odor pleasantness scale	404	-0.564709	-1.44948	0.320062	0.210942
Spirometry	FEV1/FVC ratio	391	-0.00414099	-0.011104	0.00282203	0.243762
DXA	BMI	402	-0.20419	-0.57064	0.16226	0.274775
Hearing	Hearing threshold at 1 kHz	103	-2.46825	-7.15511	2.21861	0.301979
Hearing	Hearing threshold at 8 kHz	103	3.48061	-3.5507	10.5119	0.331931
DXA	FMI	402	-0.226235	-0.722614	0.270143	0.37169
Smell	Odor pleasantness banana	406	-0.116379	-0.39256	0.159802	0.408851
Vital signs	Heart rate	402	-0.722968	-2.5748	1.12886	0.444154
Smell	Identification score	404	-0.212716	-0.781498	0.356065	0.46355
CPET	VO2 max	251	-0.48419	-1.91041	0.94203	0.505792
Hearing	Hearing threshold at 2 kHz	103	-1.92941	-8.16588	4.30707	0.544266
Grip strength	Grip strength	191	0.548669	-1.31006	2.4074	0.562884
Hearing	PTA hearing threshold	103	-1.27782	-5.91548	3.35983	0.589168
Smell	Odor pleasantness peppermint	406	-0.0597556	-0.27675	0.157239	0.589375
Vital signs	SpO2	402	0.648382	-1.76586	3.06262	0.598618
Spirometry	FVC	391	-0.278195	-1.34791	0.791523	0.610244
Grip strength	Grip strength women	108	0.447934	-1.36249	2.25836	0.627717
DXA	LMI	402	-0.0413458	-0.233779	0.151087	0.673666
Hearing	Hearing threshold at 0.5 kHz	103	-0.573563	-3.3145	2.16738	0.681699
Smell	Odor pleasantness fish	405	0.0403497	-0.23917	0.31987	0.777228
Smell	Odor intensity fish	406	-0.0337109	-0.299111	0.231689	0.803394
Hearing	Hearing threshold at 6 kHz	103	0.731731	-6.32336	7.78682	0.838912
Vital signs	Diastolic blood pressure	402	-0.0289745	-0.32366	0.265711	0.847183
CPET	Load	254	0.609923	-5.88481	7.10466	0.853963
Grip strength	Grip strength men	83	0.294997	-3.27409	3.86409	0.871305
Hearing	Hearing threshold at 4 kHz	103	-0.422485	-7.69833	6.85336	0.909388
Vital signs	Systolic blood pressure	402	-0.0770701	-2.98346	2.82932	0.958549

[truncated: 5 more sheets: S7a Cognitive tests, S7b Cognitive tests adj, S8a Blood tests, S8b Blood tests adj, S9 Long Covid ]
